# Supplementary material
Source: publisher figshare collection journal article supplement (https://acs.figshare.com/ndownloader/files/5079514)

# Suzuki-Miyaura Cross-Coupling Reactions of Aryl Tellurides with Potassium Aryltrifluoroborate Salts

*Rodrigo Cella,<sup>a</sup> Rodrigo L. O. R. Cunha,<sup>b</sup> Ana E. S. Reis,<sup>c</sup> Daniel C. Pimenta,<sup>d</sup> Clécio F. Klitzke<sup>d</sup> and*

*Hélio A. Stefani.<sup>a,b,c,\*</sup>*

<sup>a</sup>Instituto de Química, Universidade de São Paulo, São Paulo, SP-Brazil. <sup>b</sup>Departamento de Biofísica, Universidade Federal de São Paulo, São Paulo, SP-Brazil. <sup>c</sup>Faculdade de Ciências Farmacêuticas, Universidade de São Paulo, São Paulo, SP-Brazil. <sup>d</sup>Laboratório de Espectrometria de Massas, Centro de Toxinologia Aplicada – CAT/CEPID, Instituto Butantan, São Paulo, SP-Brazil

hstefani@usp.br

## Table of contents

|                                                                         |    |
|-------------------------------------------------------------------------|----|
| General.....                                                            | 2  |
| Potassium Organotrifluoroborate Synthesis.....                          | 2  |
| Butyl(aryl)tellanes Synthesis.....                                      | 2  |
| Representative Procedure of Suzuki-Miyaura Cross-Coupling Reaction..... | 7  |
| References.....                                                         | 12 |
| NMR spectra.....                                                        | 14 |
| ESI-MS spectra.....                                                     | 30 |

## Experimental Section

**General:** Palladium catalyst and silver (I) oxide were obtained from a commercial sources. The triethylamine was distilled from potassium hydroxide and the methanol was distilled from sodium methoxide and kept over molecular sieves. THF was distilled from sodium benzophenone.

**Mass Spectrometric Experiments.** Typically, aliquots of 40  $\mu\text{L}$  were taken from the reaction mixture and diluted in 960  $\mu\text{L}$  of methanol containing 10  $\mu\text{L}$  of formic acid for acid quenching. 10  $\mu\text{L}$  of sample was analyzed in the spectrometer with a capillary voltage of 3.1 kV, cone voltage of 20 to 75 V. The collision induced dissociation (CID) for MS/MS experiments were performed with collision energy ranged from 10 to 40 eV with argon as collision gas

### Potassium Organotrifluoroborate synthesis

Potassium phenyltrifluoroborate (**2a**), potassium 4-methoxyphenyltrifluoroborate (**2b**), potassium 4-chlorophenylborate (**2c**), potassium 2-furyltrifluoroborate (**2d**) and potassium 3-methoxyphenyltrifluoroborate (**2e**) were prepared from boronic acids according to the reported procedures.<sup>1</sup>

### Butyl(aryl)tellanes synthesis.

**Method A:**<sup>2</sup> To a solution of arylmagnesium bromide (20 mmol) in THF (25 mL) was added elemental tellurium (2.55 g, 20 mmol), in one portion, at room temperature (rt). The resulting suspension was stirred for 2 h at the same temperature. The mixture was then cooled to  $-20^{\circ}\text{C}$  and *n*-bromobutane (2.88 g, 21 mmol) was added dropwise. After stirring at rt for 2 h, the reaction was diluted with ethyl acetate (50 mL) and then washed with brine (3 x 20 mL). The organic layer was dried

over  $\text{MgSO}_4$  and concentrated under vacuum. The crude product was purified by silica gel chromatography to afford the respective aryl butyl telluride.

**Method B:**<sup>3</sup> The 4-hydroxyphenyl tellurium trichloride (3.27 g, 10 mmol) was dissolved in THF (40 mL) and *n*-bromobutane (1.64g, 12 mmol) was added. The mixture was cooled to 0°C and a solution of sodium borohydride (0.75 g, 20mmol) in water (20 mL) was added dropwise. The reaction was stirred for further 20 min at room temperature and quenched with saturated solution of  $\text{NH}_4\text{Cl}$  (30 mL). The mixture was extracted with ethyl acetate (3x 20 mL) and washed with brine (2 x 20 mL). The organic layers were combined, dried over  $\text{MgSO}_4$  and concentrated under vacuum. The crude product was purified by silica gel chromatography (eluting with hexane:ethyl acetate 8:2) to yield butyl(4-hydroxyphenyl)tellane (**1f**) ( 1.94g, 70%).  $^1\text{H}$  NMR (300 MHz,  $\text{CDCl}_3$ )  $\delta$  ppm 7.64 (d, *J* 8.6 Hz, 2H), 6.72 (d, *J* 8.2 Hz, 2H), 5.40 (br s, 1H), 2.82 (t, *J* 7.5 Hz, 2H), 1.75 (qn, *J* 7.3 Hz, 2H), 1.37 (sex, *J* 7.3 Hz, 2H), 0.90 (t, *J* 7.2 Hz, 3H).  $^{13}\text{C}$  NMR (75 MHz,  $\text{CDCl}_3$ )  $\delta$  ppm 155.6, 141.0, 116.5, 100.6, 33.8, 24.9, 13.3, 8.8. MS: *m/z* (%) 280 (13); 278 (12); 220 (8); 94 (100); 57 (28).

**Method C:**<sup>4</sup> An aqueous solution of sodium nitrite (1.73g, 25 mmol in 10 mL of water) was added dropwise to a solution of appropriated aniline (17 mmol), hydrochloric acid concentrate (5 mL) in water (5 mL) at 0 °C and stirred for 5 minutes. After the reaction mixture was treated with a saturated solution of  $\text{NaHCO}_3$  and then was added a solution of *n*-butyl ditelluride (1.98g, 5 mmol) in dichloromethane (15 mL) at 0 °C. The reaction was stirred for further 30 minutes at room temperature and quenched with brine (15 mL). The mixture was extracted with dichloromethane (2 x 15 mL) and washed with brine (2 x 20 mL). The organic layers were combined, dried over  $\text{MgSO}_4$  and concentrated under vacuum. The crude product was purified by silica gel chromatography to afford the respective aryl butyl telluride.

**Method D:**<sup>5</sup> *n*-Buthyllithium (5 mmol, 1.6M in hexane, 1.87 mL) was added to a solution of the appropriated heterocycle (5 mmol) in THF (5 mL) at 75 °C and stirred for 45 min. After this time was added elemental tellurium (0.638 g, 5 mmol), in one portion, at room temperature (rt). The resulting suspension was stirred for 2 h at the same temperature. The mixture was then cooled to -20 °C and *n*-

bromobutane (0.82 g, 6 mmol) was added dropwise. After stirring at rt for 2 h, the reaction was diluted with ethyl acetate (50 mL) and then washed with brine (3 x 20 mL). The organic layer was dried over MgSO<sub>4</sub> and concentrated under vacuum. The crude product was purified by silica gel chromatography to afford the respective heteroaryl butyl telluride.

**Butyl(4-methoxyphenyl)tellane (1a).**<sup>3</sup> This product was obtained as a yellow oil in 80% yield from 4-methoxybromobenzene, elemental tellurium and *n*-bromobutane by method **A**, after purification by chromatography on silica gel (eluting with hexane:ethyl acetate 9.5:0.5). <sup>1</sup>H NMR (300 MHz, CDCl<sub>3</sub>) δ ppm 7.62 (d, *J* 8.73 Hz, 2H), 6.7 (d, *J* 8.7 Hz, 2H), 3.73 (s, 3H), 2.77 (t, *J* 7.7 Hz, 2H), 1.68 (qn, *J* 7.2 Hz, 2H), 1.32 (sex, *J* 7.3 Hz, 2H), 0.83 (t, *J* 7.3 Hz, 3H). <sup>13</sup>C NMR (75 MHz, CDCl<sub>3</sub>) δ ppm 159.8, 141.1, 115.3, 100.8, 55.3, 34.1, 25.2, 13.6, 8.9. MS: *m/z* (%) 294 (48); 292 (50); 234 (33); 108 (100); 77 (38).

**Butyl(4-nitrophenyl)tellane (1b).** This product was obtained as a yellow oil in 60% yield from 4-nitroaniline and *n*-butyl ditelluride by method **C**, after purification by chromatography on silica gel (eluting with hexane:ethyl acetate 9:1). <sup>1</sup>H NMR (300 MHz, CDCl<sub>3</sub>) δ ppm 8.00 (d, *J* 8.9 Hz, 2H), 7.74 (d, *J* 8.7 Hz, 2H), 3.03 (t, *J* 7.5 Hz, 2H), 1.84 (qn, *J* 7.5 Hz, 2H), 1.43 (sex, *J* 7.5 Hz, 2H), 0.93 (t, *J* 7.3 Hz, 3H). <sup>13</sup>C NMR (75 MHz, CDCl<sub>3</sub>) δ ppm 146.9, 136.2, 124.3, 123.4, 33.4, 25.0, 13.3, 9.2. MS: *m/z* (%) 308 (7); 306 (6); 249 (2); 203 (4); 76 (28); 57 (100).

**Butyl(4-methylphenyl)tellane (1c).**<sup>3</sup> This product was obtained as a yellow oil in 69% yield from 4-methylphenyl tellurium trichloride and *n*-bromobutane by method **B**, after purification by chromatography on silica gel (eluting with hexane). <sup>1</sup>H NMR (300 MHz, CDCl<sub>3</sub>) δ ppm 7.61 (d, *J* 7.9 Hz, 2H), 7.00 (d, *J* 7.9 Hz, 2H), 2.85 (t, *J* 7.6 Hz, 2H), 2.32 (s, 3H), 1.75 (qn, *J* 7.3 Hz, 2H), 1.37 (sex, *J* 7.4 Hz, 2H), 0.88 (t, *J* 7.3 Hz, 3H). <sup>13</sup>C NMR (75 MHz, CDCl<sub>3</sub>) δ ppm 138.8, 137.6, 130.2, 107.7, 34.1, 25.2, 21.4, 13.6, 8.6. MS: *m/z* (%) 278 (17); 276 (16); 219 (8); 91 (100); 57 (38).

**Butyl(2-methylphenyl)tellane (1d).** This product was obtained as a yellow oil in 65% yield from 2-bromotoluene, elemental tellurium and *n*-bromobutane by method **A**, after purification by

chromatography on silica gel (eluting with hexane).  $^1\text{H}$  NMR (300 MHz,  $\text{CDCl}_3$ )  $\delta$  ppm 7.56 (d,  $J$  7.59 Hz, 1H), 7.18-7.0 (m, 2H), 6.95 (t,  $J$  7.46 Hz, 1H), 2.83 (t,  $J$  7.5 Hz, 2H), 2.37 (s, 3H), 1.73 (qn,  $J$  7.2 Hz, 2H), 1.36 (sex,  $J$  7.3 Hz, 2H), 0.86 (t,  $J$  7.3 Hz, 3H).  $^{13}\text{C}$  NMR (75 MHz,  $\text{CDCl}_3$ )  $\delta$  ppm 142.5, 136.8, 129.2, 127.7, 126.6, 116.7, 33.8, 26.6, 25.4, 13.6, 7.7. MS:  $m/z$  (%) 278 (30); 276 (30); 219 (14); 91 (100); 57 (36). Anal. Calcd. For  $\text{C}_{11}\text{H}_{16}\text{Te}$ : C, 47.9; H, 5.85. Found: C, 48.24; H, 6.19.

**Butyl(naphthalene-1-yl)tellane (1e).**<sup>6</sup> This product was obtained as a yellow oil in 86% yield from 1-bromonaphthalene, elemental tellurium and *n*-bromobutane by method **A**, after purification by chromatography on silica gel (eluting with hexane).  $^1\text{H}$  NMR (300 MHz,  $\text{CDCl}_3$ )  $\delta$  ppm 8.22 (d,  $J$  8.1 Hz, 1H), 8.02 (d,  $J$  7.0 Hz, 1H), 7.76-7.72 (m, 2H), 7.53-7.422 (m, 2H), 7.24 (t,  $J$  8.1 Hz, 1H), 2.88 (t,  $J$  7.6 Hz, 2H), 1.70 (qn,  $J$  7.3 Hz, 2H), 1.34 (sex,  $J$  7.4 Hz, 2H), 0.80 (t,  $J$  7.3 Hz, 3H).  $^{13}\text{C}$  NMR (75 MHz,  $\text{CDCl}_3$ )  $\delta$  ppm 138.2, 136.3, 133.4, 132.1, 128.8, 128.7, 126.6, 126.1, 126.0, 115.5, 33.7, 25.0, 13.3, 8.6. MS:  $m/z$  (%) 314 (23); 312 (22); 255 (12); 128 (100); 57 (32).

**1-(4-(butyltellanyl)phenyl)ethanone (1g).** This product was obtained as a yellow oil in 65% yield from 1-(4-aminophenyl)ethanone and *n*-butyl ditelluride by method **C**, after purification by chromatography on silica gel (eluting with hexane:ethyl acetate 9:1).  $^1\text{H}$  NMR (300 MHz,  $\text{CDCl}_3$ )  $\delta$  ppm 7.67-7.61 (m, 4H), 2.88 (t,  $J$  7.2 Hz, 2H), 2.48 (s, 3H), 1.73 (qn,  $J$  8.1 Hz, 2H), 1.33 (sex,  $J$  7.6 Hz, 2H), 0.83 (t,  $J$  7.5 Hz, 3H).  $^{13}\text{C}$  NMR (75 MHz,  $\text{CDCl}_3$ )  $\delta$  ppm 197.7, 136.7, 135.9, 128.6, 121.0, 33.8, 26.7, 25.2, 13.5, 8.8. MS:  $m/z$  (%) 306 (15); 304 (14); 247 (3); 232 (9); 204 (7); 76 (25); 57 (58); 43 (100). Anal. Calcd. For  $\text{C}_{12}\text{H}_{16}\text{OTe}$ : C, 47.43; H, 5.31. Found: C, 47.28; H, 5.28.

**Methyl 4-(butyltellanyl)benzoate (1h).** This product was obtained as a yellow oil in 59% yield from methyl 4-aminobenzoate and *n*-butyl ditelluride by method **C**, after purification by chromatography on silica gel (eluting with hexane:ethyl acetate 9:1).  $^1\text{H}$  NMR (300 MHz,  $\text{CDCl}_3$ )  $\delta$  ppm 7.74 (d,  $J$  8.3 Hz, 2H), 7.62 (d,  $J$  8.3 Hz, 2H), 3.85 (s, 3H), 2.89 (t,  $J$  7.4 Hz, 2H), 1.73 (qn,  $J$  7.2 Hz, 2H), 1.33 (sex,  $J$  7.5 Hz, 2H), 0.83 (t,  $J$  7.4 Hz, 3H).  $^{13}\text{C}$  NMR (75 MHz,  $\text{CDCl}_3$ )  $\delta$  ppm 167.2, 136.8, 130.0, 129.1, 120.4, 52.3, 33.9, 25.3, 13.6, 8.8. MS:  $m/z$  (%) 322 (26); 320 (25); 289 (2); 263 (7); 232 (16); 204

(10); 135 (6); 105 (100); 76 (42); 57 (95). Anal. Calcd. For  $C_{12}H_{16}O_2Te$ : C, 45.06; H, 5.04. Found: C, 45.23; H, 4.87.

**2-(Butyltellanyl)thiophene (1i).**<sup>7</sup> This product was obtained as a yellow oil in 83% yield from 2-bromothiophene, elemental tellurium and *n*-bromobutane by method **D**, after purification by chromatography on silica gel (eluting with hexane).  $^1H$  NMR (300 MHz,  $CDCl_3$ )  $\delta$  ppm 7.35 (d, *J* 4.6 Hz, 1H), 7.29 (d, *J* 3.4, 1H), 6.86 (dd, *J* 5.1;3.6 Hz, 1H), 2.72 (t, *J* 7.6 Hz, 2H), 1.67 (qn, *J* 7.7, 2H), 1.30 (sex, *J* 7.3 Hz, 2H), 0.81 (t, *J* 7.3 Hz, 3H).  $^{13}C$  NMR (75 MHz,  $CDCl_3$ )  $\delta$  ppm 141.4, 134.2, 128.9, 97.5, 33.8, 25, 13.6, 11.5 MS: *m/z* (%) 270 (54); 268 (53); 210 (28); 83 (100); 57 (85).

**2-(Butyltellanyl)furan (1j).**<sup>5</sup> This product was obtained as a yellow oil in 87% yield from 2-bromofuran, elemental tellurium and *n*-bromobutane by method **D**, after purification by chromatography on silica gel (eluting with hexane).  $^1H$  NMR (300 MHz,  $CDCl_3$ )  $\delta$  ppm 7.55 (d, *J* 4.6 Hz, 1H), 6.72 (d, *J* 4.0, 1H), 6.31 (dd, *J* 4.9; 3.1 Hz, 1H), 2.75 (t, *J* 7.3 Hz, 2H), 1.72 (qn, *J* 7.9, 2H), 1.36 (sex, *J* 7.3 Hz, 2H), 0.87 (t, *J* 6.0 Hz, 3H).  $^{13}C$  NMR (75 MHz,  $CDCl_3$ )  $\delta$  ppm 148.5, 125.8, 118.6, 111.8, 34.0, 24.8, 13.5, 10.0. MS: *m/z* (%) 254 (65); 252 (64); 194 (18); 67 (85); 57 (90); 41 (100).

**3-(Butyltellanyl)pyridine (1k).** This product was obtained as a yellow oil in 75% yield from 3-bromopyridine, elemental tellurium and *n*-bromobutane by method **D**, after purification by chromatography on silica gel (eluting with hexane:ethyl acetate 8:2).  $^1H$  NMR (300 MHz,  $CDCl_3$ )  $\delta$  ppm 8.86 (d, *J* 1.0 Hz, 1H), 8.47 (d, *J* 4.8 Hz, 1H), 7.99 (dt, *J* 7.8; 1.7 Hz, 1H), 7.11 (dd, *J* 7.73; 4.8 Hz, 1H), 2.88 (t, *J* 7.4 Hz, 2H), 1.74 (qn, *J* 7.4, 2H), 1.36 (sex, *J* 7.4 Hz, 2H), 0.86 (t, *J* 7.4 Hz, 3H).  $^{13}C$  NMR (75 MHz,  $CDCl_3$ )  $\delta$  ppm 157.9, 148.6, 145.9, 124.5, 109.4, 34.0, 25.1, 13.54, 9.1. MS: *m/z* (%) 265 (43); 263 (43); 205 (39); 78 (100); 57 (67). Anal. Calcd. For  $C_9H_{13}NTe$ : C, 41.13; H, 4.99; N, 5.33. Found: C, 40.73; H, 4.91; N, 5.71.

**Butyl(4-chlorophenyl)tellane (1l).** This product was obtained as a yellow oil in 80% yield from 4-bromochlorobenzene, elemental tellurium and *n*-bromobutane by method **A**, after purification by chromatography on silica gel (eluting with hexane:ethyl acetate 9.5:0.5).  $^1H$  NMR (300 MHz,  $CDCl_3$ )  $\delta$

ppm 7.60 (d, *J* 8.4 Hz, 2H), 7.14 (d, *J* 8.4 Hz, 2H), 2.87 (t, *J* 7.5 Hz, 2H), 1.75 (qn, *J* 7.3 Hz, 2H), 1.37 (sex, *J* 7.2 Hz, 2H), 0.89 (t, *J* 7.3 Hz, 3H). <sup>13</sup>C NMR (75 MHz, CDCl<sub>3</sub>) δ ppm 139.6, 133.9, 129.2, 109.3, 33.8, 25.0, 13.4, 8.9. MS: *m/z* (%) 298 (46); 296 (41); 294 (24); 239 (34); 203 (3); 111 (53); 76 (41); 57 (100). Anal. Calcd. For C<sub>10</sub>H<sub>13</sub>ClTe: C, 40.54; H, 4.42. Found: C, 40.91; H, 4.31.

**Butyl(4-bromophenyl)tellane (1m).** This product was obtained as a yellow oil in 51% yield from 4-bromoaniline and *n*-butyl ditelluride by method **C**, after purification by chromatography on silica gel (eluting with hexane:ethyl acetate 9.5:0.5). <sup>1</sup>H NMR (300 MHz, CDCl<sub>3</sub>) δ ppm 7.48 (d, *J* 8.2 Hz, 2H), 7.23 (d, *J* 8.2 Hz, 2H), 2.81 (t, *J* 7.4 Hz, 2H), 1.69 (qn, *J* 7.2 Hz, 2H), 1.31 (sex, *J* 7.3 Hz, 2H), 0.82 (t, *J* 7.4 Hz, 3H). <sup>13</sup>C NMR (75 MHz, CDCl<sub>3</sub>) δ ppm 140.2, 132.4, 122.4, 110.2, 34.0, 25.2, 13.6, 9.1. MS: *m/z* (%) 341 (20); 284 (12); 204 (10); 156 (15); 76 (44); 57 (100).

**Butyl(4-iodophenyl)tellane (1n).** This product was obtained as a yellow oil in 48% yield from 4-iodoaniline and *n*-butyl ditelluride by method **C**, after purification by chromatography on silica gel (eluting with hexane:ethyl acetate 9.5:0.5). <sup>1</sup>H NMR (300 MHz, CDCl<sub>3</sub>) δ ppm 7.47 (d, *J* 8.2 Hz, 2H), 7.39 (d, *J* 8.1 Hz, 2H), 2.85 (t, *J* 7.5 Hz, 2H), 1.75 (qn, *J* 7.2 Hz, 2H), 1.37 (sex, *J* 7.4 Hz, 2H), 0.88 (t, *J* 7.3 Hz, 3H). <sup>13</sup>C NMR (75 MHz, CDCl<sub>3</sub>) δ ppm 139.8, 138.0, 111.1, 93.8, 33.5, 24.9, 13.4, 8.8. MS: *m/z* (%) 390 (8); 388 (8); 330 (3); 204 (6); 76 (42); 57 (100). Anal. Calcd. For C<sub>10</sub>H<sub>13</sub>ITe: C, 30.98; H, 3.38. Found: C, 31.28; H, 3.51.

**Butyl(Phenyl)tellane (1o).**<sup>2</sup> This product was obtained as a yellow oil in 85% yield from bromobenzene, elemental tellurium and *n*-bromobutane by method **A**, after purification by chromatography on silica gel (eluting with hexane:ethyl acetate 9.5:0.5). <sup>1</sup>H NMR (300 MHz, CDCl<sub>3</sub>) δ ppm 7.61 (d, *J* 8.0 Hz, 2H), 7.18-7.04 (m, 3H), 2.79 (t, *J* 7.4 Hz, 2H), 1.67 (qn, *J* 7.2 Hz, 2H), 1.29 (sex, *J* 7.5 Hz, 2H), 0.79 (t, *J* 7.4 Hz, 3H). <sup>13</sup>C NMR (75 MHz, CDCl<sub>3</sub>) δ ppm 138.3, 129.2, 127.5, 112.0, 34.0, 25.2, 13.5, 8.6. MS: *m/z* (%) 264 (34); 262 (34); 204 (24); 77 (100); 57 (53).

**Representative Procedure of Suzuki-Miyaura Cross-Coupling Reaction.** To a suspension of butyl(4-methoxyphenyl)tellane (**1a**) (0.146 g, 0.5 mmol), potassium phenyltrifluoroborate (**2a**) (0.110 g, 0.6 mmol), Pd(Ph<sub>3</sub>P)<sub>4</sub> (0.058 g, 0.05mmol) and silver (I) oxide (0.232 g, 1 mmol) in 3 mL of methanol was added triethylamine (0.2 g, 2 mmol), and the reaction mixture was stirred and heated at reflux for 90 minutes, then cooled to room temperature and diluted with ethyl acetate (30 mL). The organic layer was washed with saturated solution of NH<sub>4</sub>Cl (2 x 10 mL) and water (2 x 10 mL), dried over MgSO<sub>4</sub> and concentrated under vacuum. Purification by silica gel chromatography (eluting with hexane:ethyl acetate 9.5:0.5) yielded **4-Methoxy-biphenyl (3a)**<sup>1</sup> (0.076g, 83%). This product was obtained as a white solid. <sup>1</sup>H NMR (300 MHz, CDCl<sub>3</sub>) δ ppm 7.52 (t, *J* 8.6 Hz, 4H), 7.39 (t, *J* 7.8 Hz, 2H), 7.28 (t, *J* 7.2 Hz, 1H), 6.95 (d, *J* 8.7 Hz, 2H), 3.80 (s, 3H). <sup>13</sup>C NMR (75 MHz, CDCl<sub>3</sub>) δ ppm 159.1, 140.8, 133.7, 128.7, 128.1, 126.7, 126.6, 114.2, 55.3. MS: m/z (%) 185 (10); 184 (100); 169 (67); 152 (21); 76 (61).

**4-Nitro-biphenyl (3b).**<sup>2</sup> This product was obtained as a white solid in 89% yield from **1b** and **2a** by the general method. <sup>1</sup>H NMR (300 MHz, CDCl<sub>3</sub>) δ ppm 8.26 (d, *J* 8.7 Hz, 2H), 7.70 (d, *J* 8.7 Hz, 2H), 7.60 (t, *J* 7.5 Hz, 2H), 7.51-7.40 (m, 3H). <sup>13</sup>C NMR (75 MHz, CDCl<sub>3</sub>) δ ppm 147.6, 147.0, 138.7, 129.1, 128.9, 127.7, 127.4, 124.1. MS: m/z (%) 200 (14); 199 (86); 152 (100); 77 (25); 76 (48).

**4-Methyl-biphenyl (3c).**<sup>8</sup> This product was obtained as a white solid in 80% yield from **1c** and **2a** by the general method. <sup>1</sup>H NMR (300 MHz, CDCl<sub>3</sub>) δ ppm 7.49 (m, 2H), 7.39 (m, 2H), 7.33 (m, 2H), 7.24 (m, 1H), 7.14 (m, 2H), 2.4 (s, 3H). <sup>13</sup>C NMR (75 MHz, CDCl<sub>3</sub>) δ ppm 141.2, 138.4, 136.9, 129.4, 128.7, 127.0, 126.9, 21. MS: m/z (%) 169 (14); 168 (100); 153 (20); 91 (10); 77 (8); 76 (9).

**2-Methyl-biphenyl (3d).**<sup>9</sup> This product was obtained as a colorless liquid in 74% yield from **1d** and **2a** by the general method. <sup>1</sup>H NMR (300 MHz, CDCl<sub>3</sub>) δ ppm 7.32-7.27 (m, 3H), 7.22-7.20 (m, 3H), 7.15-7.12 (m, 3H), 2.16 (s, 3H). <sup>13</sup>C NMR (75 MHz, CDCl<sub>3</sub>) δ ppm 142.3, 135.6, 130.6, 130.1, 129.5, 129.0, 128.4, 127.6, 127.5, 127.1, 126.1, 20.8. MS: m/z (%) 169 (6); 168 (32); 153 (100); 91 (6); 77 (38); 76 (72).

**1-Phenylnaphtalene (3e).**<sup>1</sup> This product was obtained as a colorless liquid in 79% yield from **1e** and **2a** by the general method. <sup>1</sup>H NMR (300 MHz, CDCl<sub>3</sub>) δ ppm 7.89-7.82 (m, 3H), 7.47-7.40 (m, 9H). <sup>13</sup>C NMR (75 MHz, CDCl<sub>3</sub>) 140.7, 140.2, 133.7, 131.6, 130.0, 128.7, 128.2, 127.6, 127.2, 127.1, 126.9, 126.0, 125.7, 125.4. δ ppm MS: m/z (%) 205 (20); 204 (29); 203 (100); 76 (18).

**4-Hidroxy-biphenyl (3f).**<sup>1</sup> This product was obtained as a white solid in 92% yield from **1f** and **2a** by the general method. <sup>1</sup>H NMR (300 MHz, CDCl<sub>3</sub>) δ ppm 7.50 (d, *J* 8.9 Hz, 2H), 7.42 (d, *J* 7.2 Hz, 2H), 7.35-7.20 (m, 5H), 1.15 (broad, 1H). <sup>13</sup>C NMR (75 MHz, CDCl<sub>3</sub>) δ ppm 141.9, 139.5, 129.2, 128.3, 127.4, 121.8, 121.1, 116.9. MS: m/z (%) 170 (23); 169 (100); 76 (6).

**1-(biphenyl-4-yl)ethanone (3g).**<sup>9</sup> This product was obtained as a white solid in 80% yield from **1g** and **2a** by the general method. <sup>1</sup>H NMR (300 MHz, CDCl<sub>3</sub>) δ ppm 7.92 (d, *J* 8.4 Hz, 2H), 7.58-7.50 (m, 4H), 7.38-7.26 (m, 3H), 2.51 (s, 3H). <sup>13</sup>C NMR (75 MHz, CDCl<sub>3</sub>) δ ppm 197.8, 145.9, 139.9, 135.9, 129.1, 129.0, 128.4, 127.4, 127.3, 26.8. MS: m/z (%) 197 (8); 196 (47); 181 (100); 153 (36); 76 (46); 43 (41).

**Methyl biphenyl-4-carboxylate (3h).**<sup>10</sup> This product was obtained as a white solid in 83% yield from **1h** and **2a** by the general method. <sup>1</sup>H NMR (300 MHz, CDCl<sub>3</sub>) δ ppm 8.14 (d, *J* 8.3 Hz, 2H), 7.66 (t, *J* 8.4 Hz, 4H), 7.51-7.41 (m, 3H), 3.96 (s, 3H). <sup>13</sup>C NMR (75 MHz, CDCl<sub>3</sub>) δ ppm 167.2, 145.8, 140.2, 130.3, 129.1, 128.3, 127.5, 127.2, 52.3. MS: m/z (%) 213 (9); 212 (55); 181 (100); 153 (32); 76 (84); 59 (2).

**2-Phenylthiophene (3i).**<sup>11</sup> This product was obtained as a colorless liquid in 46% yield from **1i** and **2a** by the general method. <sup>1</sup>H NMR (200 MHz, CDCl<sub>3</sub>) δ ppm 7.61 (d, *J* 6.9 Hz, 1H); 7.37-7.16 (m, 5H), 7.02-6.99 (m, 2H). <sup>13</sup>C NMR (50 MHz, CDCl<sub>3</sub>) δ ppm 137.4, 134.4, 128.8, 127.7, 125.9, 124.8, 124.3, 123.1. MS: m/z (%) 161 (19); 160 (100); 82 (4); 77 (13).

**2-Phenylfuran (3j).**<sup>11</sup> This product was obtained as a colorless liquid in 63% yield from **1j** and **2a** by the general method. <sup>1</sup>H NMR (400 MHz, CDCl<sub>3</sub>) δ ppm 7.68 (t, *J* 8.3, 2H), 7.44 (d, *J* 8.9, 1H), 7.39-

7.24 (m, 3H), 6.64 (d, *J* 3.4, 1H), 6.45 (dd, *J* 3.34; 1.8, 1H). <sup>13</sup>C NMR (100 MHz, CDCl<sub>3</sub>) δ ppm 141.7, 131.5, 129.9, 128.6, 127.3, 126.8, 123.8, 122.5 MS: *m/z* (%) 145 (39); 144 (88); 115 (100); 77 (23); 65 (37).

**3-Phenylpyridine (3k).**<sup>10</sup> This product was obtained as a yellow liquid in 65% yield from **1k** and **2a** by the general method. <sup>1</sup>H NMR (300 MHz, CDCl<sub>3</sub>) δ ppm 8.72 (d, *J* 2.3 Hz, 1H), 8.46 (dd, *J* 4.8; 1.1 Hz, 1H), 7.75 (dt, *J* 8.0; 1.6 Hz, 1H), 7.46 (d, *J* 7.0 Hz, 2H), 7.36 (t, *J* 7.0 Hz, 1H), 7.30-7.21 (m, 3H). <sup>13</sup>C NMR (75 MHz, CDCl<sub>3</sub>) δ ppm 148.5, 148.3, 137.9, 136.7, 134.4, 129.2, 128.2, 127.2, 123.6. MS: *m/z* (%) 156 (20); 155 (100); 78 (10); 77 (47).

**4-Chloro-biphenyl (3l).**<sup>1</sup> This product was obtained as a white solid in 83% yield from **1l** and **2a** by the general method. <sup>1</sup>H NMR (300 MHz, CDCl<sub>3</sub>) δ ppm 7.80-7.12 (m, 9H). <sup>13</sup>C NMR (75 MHz, CDCl<sub>3</sub>) δ ppm 139.9, 139.6, 133.3, 128.9, 128.8, 128.4, 127.6, 126.9. MS: *m/z* (%) 190 (41); 188 (100); 153 (27); 152 (68); 76 (58).

**4-Bromo-biphenyl (3m).**<sup>12</sup> This product was obtained as a white solid in 84% yield from **1m** and **2a** by the general method. <sup>1</sup>H NMR (300 MHz, CDCl<sub>3</sub>) δ ppm 7.49-7.44 (m, 4H), 7.38-7.25 (m, 5H). <sup>13</sup>C NMR (75 MHz, CDCl<sub>3</sub>) δ ppm 140.3, 140.1, 132.0, 129.1, 128.9, 127.8, 127.1, 121.7. MS: *m/z* (%) 234 (77); 233 (10); 232 (78); 153 (20); 77 (24); 76 (100).

**4-Iodo-biphenyl (3n).**<sup>1b</sup> This product was obtained as a white solid in 42% yield from **1n** and **2a** by the general method. <sup>1</sup>H NMR (300 MHz, CDCl<sub>3</sub>) δ ppm 7.68 (d, *J* 9.0 Hz, 2H), 7.46 (d, *J* 6.0 Hz, 2H), 7.35 (d, *J* 6.0 Hz, 2H), 7.29-7.22 (m, 3H). <sup>13</sup>C NMR (75 MHz, CDCl<sub>3</sub>) δ ppm 140.9, 140.2, 138.0, 129.2, 129.1, 127.9, 127.1, 93.2. MS: *m/z* (%) 281 (16); 280 (100); 153 (31); 127 (16); 77 (21); 76 (71).

**1-(4-Methoxyphenyl)naphthalene (3o).**<sup>13</sup> This product was obtained as a white solid in 87% yield from **1e** and **2b** by the general method. <sup>1</sup>H NMR (300 MHz, CDCl<sub>3</sub>) δ ppm 7.93-7.78 (m, 3H), 7.49-7.36 (m, 6H), 6.99 (d, *J* 8.6 Hz, 2H), 3.83 (s, 3H). <sup>13</sup>C NMR (75 MHz, CDCl<sub>3</sub>) δ ppm 159.4, 140.4,

134.3, 133.6, 132.3, 131.6, 128.8, 127.8, 127.4, 126.7, 126.6, 126.2, 125.9, 114.2, 55.8. MS: m/z (%) 235 (19); 234 (100); 219 (29); 203 (11).

**4-Chloro-4'-methoxybiphenyl (3p).**<sup>14</sup> This product was obtained as a white solid in 75% yield from **1l** and **2b** by the general method. <sup>1</sup>H NMR (300 MHz, CDCl<sub>3</sub>) δ ppm 7.50-7.43 (m, 4H), 7.35 (d, *J* 8.6 Hz, 2H), 6.95 (d, *J* 8.8 Hz, 2H), 3.82 (s, 3H). <sup>13</sup>C NMR (75 MHz, CDCl<sub>3</sub>) δ ppm 159.3, 139.2, 132.6, 132.4, 128.8, 128.0, 127.9, 114.3, 55.3. MS: m/z (%) 220 (33); 218 (100); 203 (48); 152 (10), 76 (16).

**1-(4-Chlorophenyl)naphthalene (3q).**<sup>13</sup> This product was obtained as a white solid in 87% yield from **1e** and **2c** by the general method. <sup>1</sup>H NMR (300 MHz, CDCl<sub>3</sub>) δ ppm 7.76-7.69 (m, 3H), 7.38-7.21 (m, 6H). <sup>13</sup>C NMR (75 MHz, CDCl<sub>3</sub>) δ ppm 139.4, 139.1, 133.5, 131.6, 131.5, 128.7, 128.6, 128.2, 127.1, 126.4, 126.1, 125.8, 125.5. MS: m/z (%) 240 (25); 238 (49); 203 (33); 126 (3), 101 (100), 76 (5).

**4-Chloro-4'-chlorobiphenyl (3r).**<sup>15</sup> This product was obtained as a white solid in 94% yield from **1l** and **2c** by the general method. <sup>1</sup>H NMR (300 MHz, CDCl<sub>3</sub>) δ ppm 7.38-7.35 (m, 4H), 7.33-7.29 (m, 4H). <sup>13</sup>C NMR (75 MHz, CDCl<sub>3</sub>) δ ppm 138.6, 133.9, 129.2, 128.4. MS: m/z (%) 220 (33); 218 (100); 203 (48); 152 (10), 76 (16).

**2-(4-Chlorophenyl)furan (3s).**<sup>16</sup> This product was obtained as a red solid in 52% yield from **1l** and **2d** by the general method. <sup>1</sup>H NMR (300 MHz, CDCl<sub>3</sub>) δ ppm 7.50 (d, *J* 6.8 Hz, 2H), 7.37 (d, *J* 1.6 Hz, 1H), 7.24 (d, *J* 6.8 Hz, 2H), 7.50 (d, *J* 6.8 Hz, 2H), 6.54 (d, *J* 3.3 Hz, 2H), 6.38 (dd, *J* 3.3; 1.8 Hz, 2H). <sup>13</sup>C NMR (75 MHz, CDCl<sub>3</sub>) δ ppm 142.5, 133.1, 129.6, 129.2, 129.0, 125.2, 111.9, 105.6. MS: m/z (%) 180 (40); 178 (93); 143 (2); 115 (100); 76 (4).

**1-(3-Methoxyphenyl)naphthalene (3t).**<sup>17</sup> This product was obtained as a colorless liquid in 79% yield from **1e** and **2e** by the general method. <sup>1</sup>H NMR (300 MHz, CDCl<sub>3</sub>) δ ppm 7.93-7.83 (m, 3H), 7.53-7.31 (m, 6H); 7.11-6.95 (m, 2H), 3.84 (s, 3H). <sup>13</sup>C NMR (75 MHz, CDCl<sub>3</sub>) δ ppm 159.7, 142.4, 140.3, 134.0, 131.8, 129.9, 129.4, 128.5, 127.9, 127.0, 126.3, 126.0, 125.5, 122.8, 119.9, 115.8, 113.1, 55.5. MS: m/z (%) 235 (31); 234 (100); 219 (23); 203 (69); 76 (7).

**4'-Chloro-3-methoxybiphenyl (3u).**<sup>18</sup> This product was obtained as a colorless liquid in 80% yield from **11** and **2e** by the general method. <sup>1</sup>H NMR (300 MHz, CDCl<sub>3</sub>) δ ppm 7.48 (d, *J* 6.7, 2H), 7.38-7.29 (m, 3H); 7.20-7.05 (m, 2H), 6.87 (d, *J* 8.2, 1H), 3.83 (s, 3H). <sup>13</sup>C NMR (75 MHz, CDCl<sub>3</sub>) δ ppm 160.3, 141.7, 139.7, 133.7, 130.1, 129.1, 128.6, 119.9, 119.7, 113.1, 55.5. MS: *m/z* (%) 220 (65); 218 (100); 203 (2); 188 (45); 152 (50); 111 (4); 76 (63).

**3-Methoxy-biphenyl (3v).**<sup>19</sup> This product was obtained as a colorless liquid in 78% yield from **1o** and **2e** by the general method. <sup>1</sup>H NMR (300 MHz, CDCl<sub>3</sub>) δ ppm 7.47 (d, *J* 7.1, 2H), 7.31 (t, *J* 7.0 Hz, 2H); 7.25-7.20 (m, 2H), 7.08-7.02 (m, 2H), 6.78 (dd, *J* 8.2; 2.4 Hz, 1H), 3.72 (s, 3H). <sup>13</sup>C NMR (75 MHz, CDCl<sub>3</sub>) δ ppm 160.2, 142.8, 141.3, 129.9, 128.9, 127.6, 127.4, 119.8, 113.0, 112.9, 55.4. MS: *m/z* (%) 185 (27); 184 (100); 169 (8); 153 (49); 77 (24); 76 (45).

## References

- 1- (a) Vedejs, E.; Chapman, R. W.; Fields, S. C.; Lin, S.; Schrimpf, M. R. *J. Org. Chem.* **1995**, *60*, 3020. (b) Darses, S.; Michaud, G.; Genêt, J.-P. *Eur. J. Org. Chem.* **1999**, 1875. (c) Molander, G. A.; Biolatto, B. *Org. Lett.* **2002**, *4*, 1867.
- 2- (a) Bowden, K.; Braude, A. E. *J. Chem. Soc.* **1952**, 1076. (b) Pourcelot, G.; Lequen, M.; Simmonin, M. P.; Cadiot, P. *Bull. Soc. Chim. Fr.* **1962**, 1278. (c) Kemmit, T.; Levanson, W. *Organomet.* **1989**, *8*, 1303.
- 3- Cunha, R. L. O.; Omori, A. T.; Castelani, P.; Toledo, F. T.; Comasseto, J. V. *J. Organomet. Chem.* **2004**, *689*, 3631.
- 4- Luxen, A.; Christiaens, L. *Tetrahedron Lett.* **1982**, *33*, 3905.
- 5- Zeni, G.; Lüdtke, D. S.; Nogueira, C. W.; Panatieri, R. B.; Braga, A. L.; Silveira, C. C.; Stefani, H. A.; Rocha, J. B. T. *Tetrahedron Lett.* **2001**, *42*, 8927.

- 6- Bhasin, K. K.; Gupta, V.; Gupta, S. K.; Sanan, K.; Sharma, R. P. *Indian Journal of Chemistry, Section A: Inorganic, Bio-inorganic, Physical, Theoretical & Analytical Chemistry* **1994**, 33A, 1110.
- 7- Zeni, G.; Nogueira, C. W.; Panatieri, R. B.; Silva, D. O.; Menezes, P. H.; Braga, A. L.; Silveira, C. C.; Stefani, H. A.; Rocha, J. B. T. *Tetrahedron Lett.* **2001**, 42, 7921.
- 8- Navarro, O.; Kelly, R. A., III; Nolan, S. P. *J. Am. Chem. Soc.* **2003**, 125, 16194.
- 9- Okamoto, K.; Akiyama, R.; Kobayashi, S. *Org. Lett.* **2004**, 6, 1987.
- 10- Mingji, D.; Liang, B.; Wang, C.; You, Z.; Xiang, J.; Dong, G.; Chen, J.; Yang, Z. *Adv. Synth. Catal.* **2004**, 346, 1669.
- 11- Zeni, G.; Alves, D.; Braga, A. L.; Stefani, H. A.; Nogueira, C. W. *Tetrahedron Lett.* **2004**, 45, 4823.
- 12- Demir, A. S.; Reis, O.; Emrullahoglu, M. *J. Org. Chem* **2003**, 68, 578.
- 13- Bumagin, N. A.; Tsarev, D. A. *Tetrahedron Lett.* **1998**, 39, 8155.
- 14- Saeki, T.; Son, E-C.; Tamao, K. *Org. Lett.* **2004**, 6, 617.
- 15- Nagano, T.; Hayashi, T. *Org. Lett.* **2005**, 7, 491.
- 16- Katritzky, A. R.; Li, J.; Gordeev, M. F. *J. Org. Chem.* **1993**, 58, 3038.
- 17- Nakamura, T.; Kinoshita, H.; Shinokubo, H.; Oshima, K. *Org. Lett.* 2002, 4, 3165.
- 18- Beadle, J. R.; Korzeniowski, S. H.; Rosenberg, D. E.; Garcia-Slanga, B. J.; Gokel, G. W. *J. Org. Chem.* 1984, 49, 159.
- 19- Stevens, P. D.; Fan, J.; Gardimalla, H. M. R.; Yen, M.; Gao, Y. *Org. Lett.* **2005**, 7, 2085.

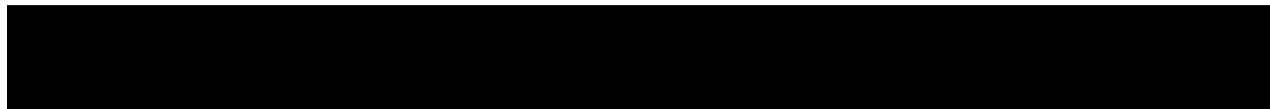

eters  
11B-C  
1  
1  
Parameters  
50520  
11.56  
spect  
nucl  
9p930  
16384  
COC13  
1024  
4  
5.611 Hz  
97755 Hz  
55252 sec  
32768  
7.800 usec  
6.00 usec  
298.0 K  
00000 sec  
00000 sec  
00000 sec  
00000 sec  
00000 sec  
1 =====  
13C  
11.00 usec  
3.00 dB  
52953 MHz  
2 =====  
1t216  
1H  
00.00 usec  
3.00 dB  
20.08 dB  
20.08 dB  
12005 MHz  
Parameters  
8192  
77347 MHz  
EM  
0  
1.00 Hz  
0  
1.40  
eters  
no no no

34.002

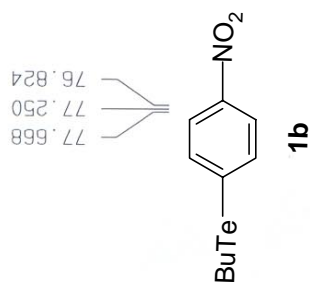

110.251

122.367

132.447

140.214

ppm

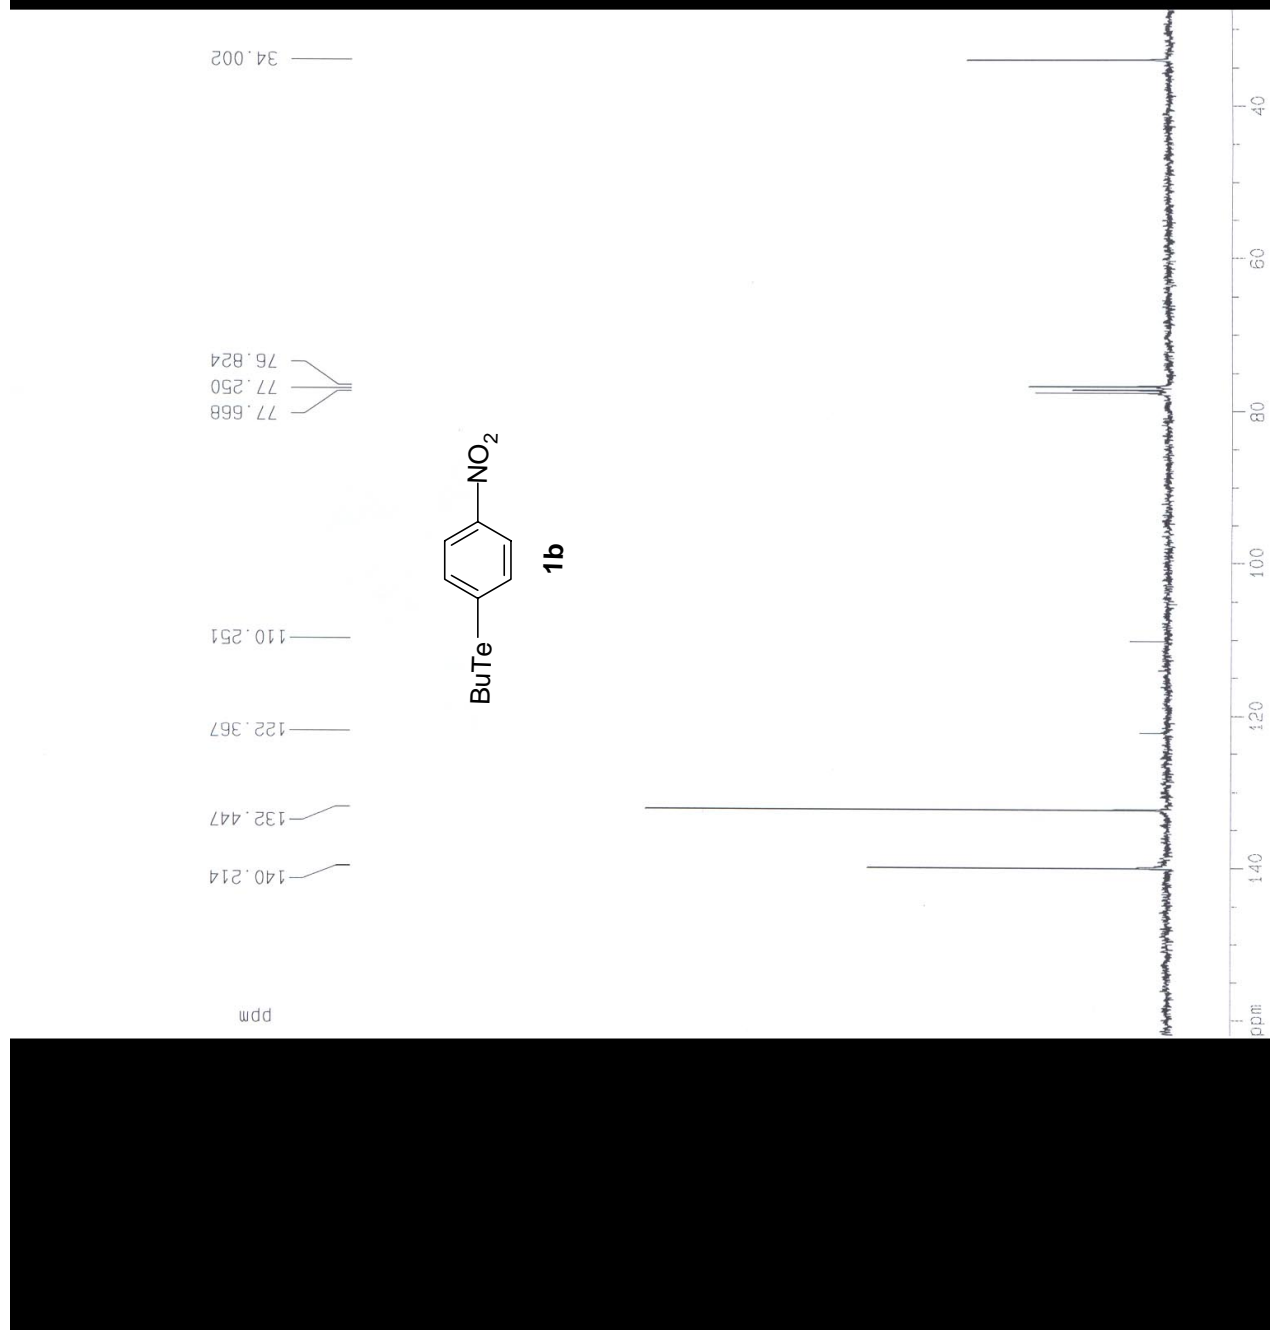

Parameters  
 11B-c 1  
 1  
 Parameters  
 50520  
 11.95  
 spect  
 Inucl  
 9930  
 16384  
 CQC13  
 1024  
 4  
 5.611 Hz  
 97755 Hz  
 55252 sec  
 32768  
 7.800 usec  
 6.00 usec  
 298.0 K  
 00000 sec  
 00000 sec  
 00000 sec  
 00000 sec  
 00000 sec  
 1 =====  
 13C  
 11.00 usec  
 3.00 dB  
 52953 MHz  
 2 =====  
 1c16  
 1H  
 00.00 usec  
 3.00 dB  
 20.08 dB  
 20.08 dB  
 12005 MHz  
 Parameters  
 8192  
 77347 MHz  
 EM  
 0  
 1.00 Hz  
 0  
 1.40  
 Parameters  
 20.00 cm  
 8.00 cm  
 2.033 ppm  
 28.25 Hz  
 8.231 ppm  
 21.20 Hz  
 51320 ppm/cm  
 47205 Hz/cm

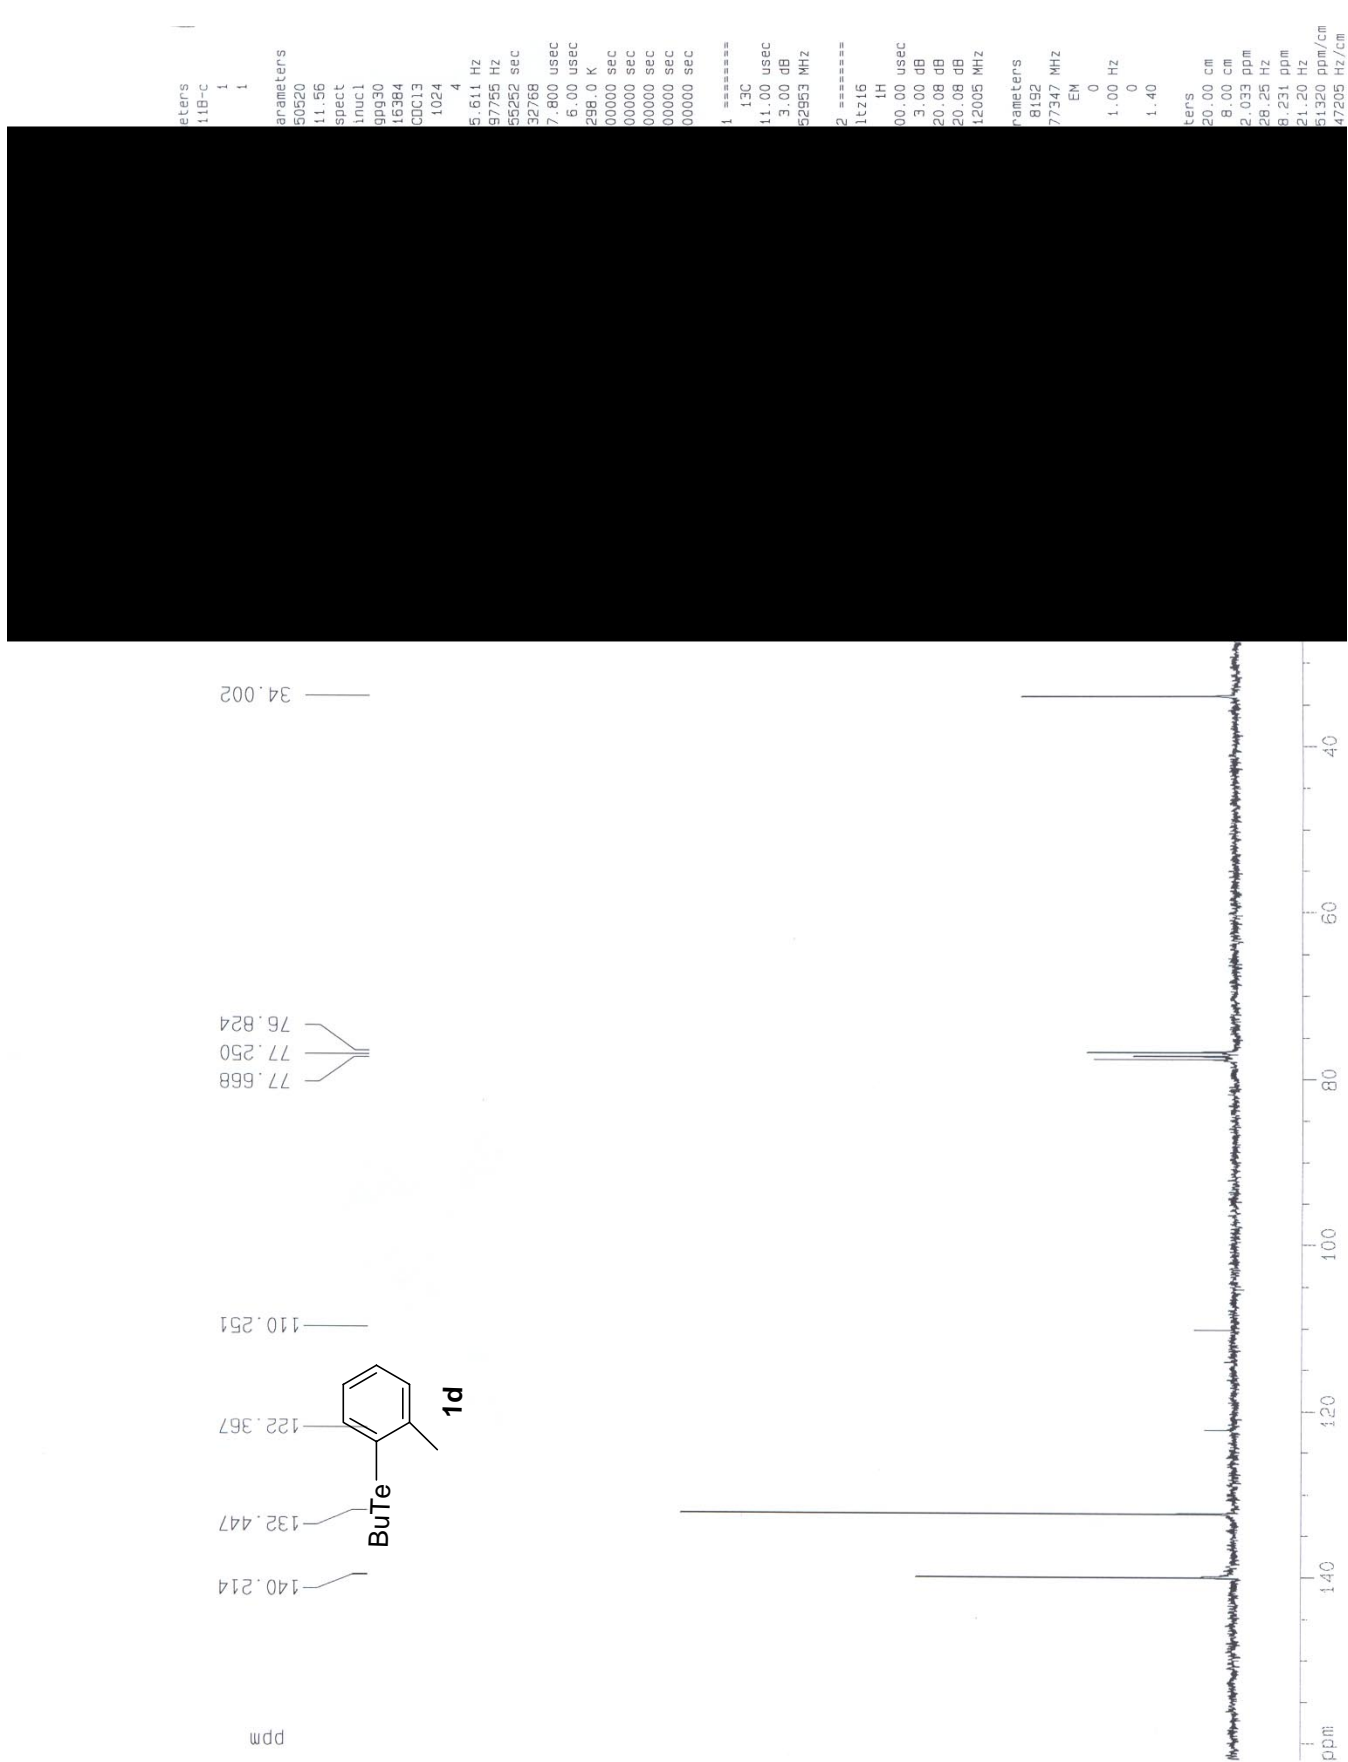

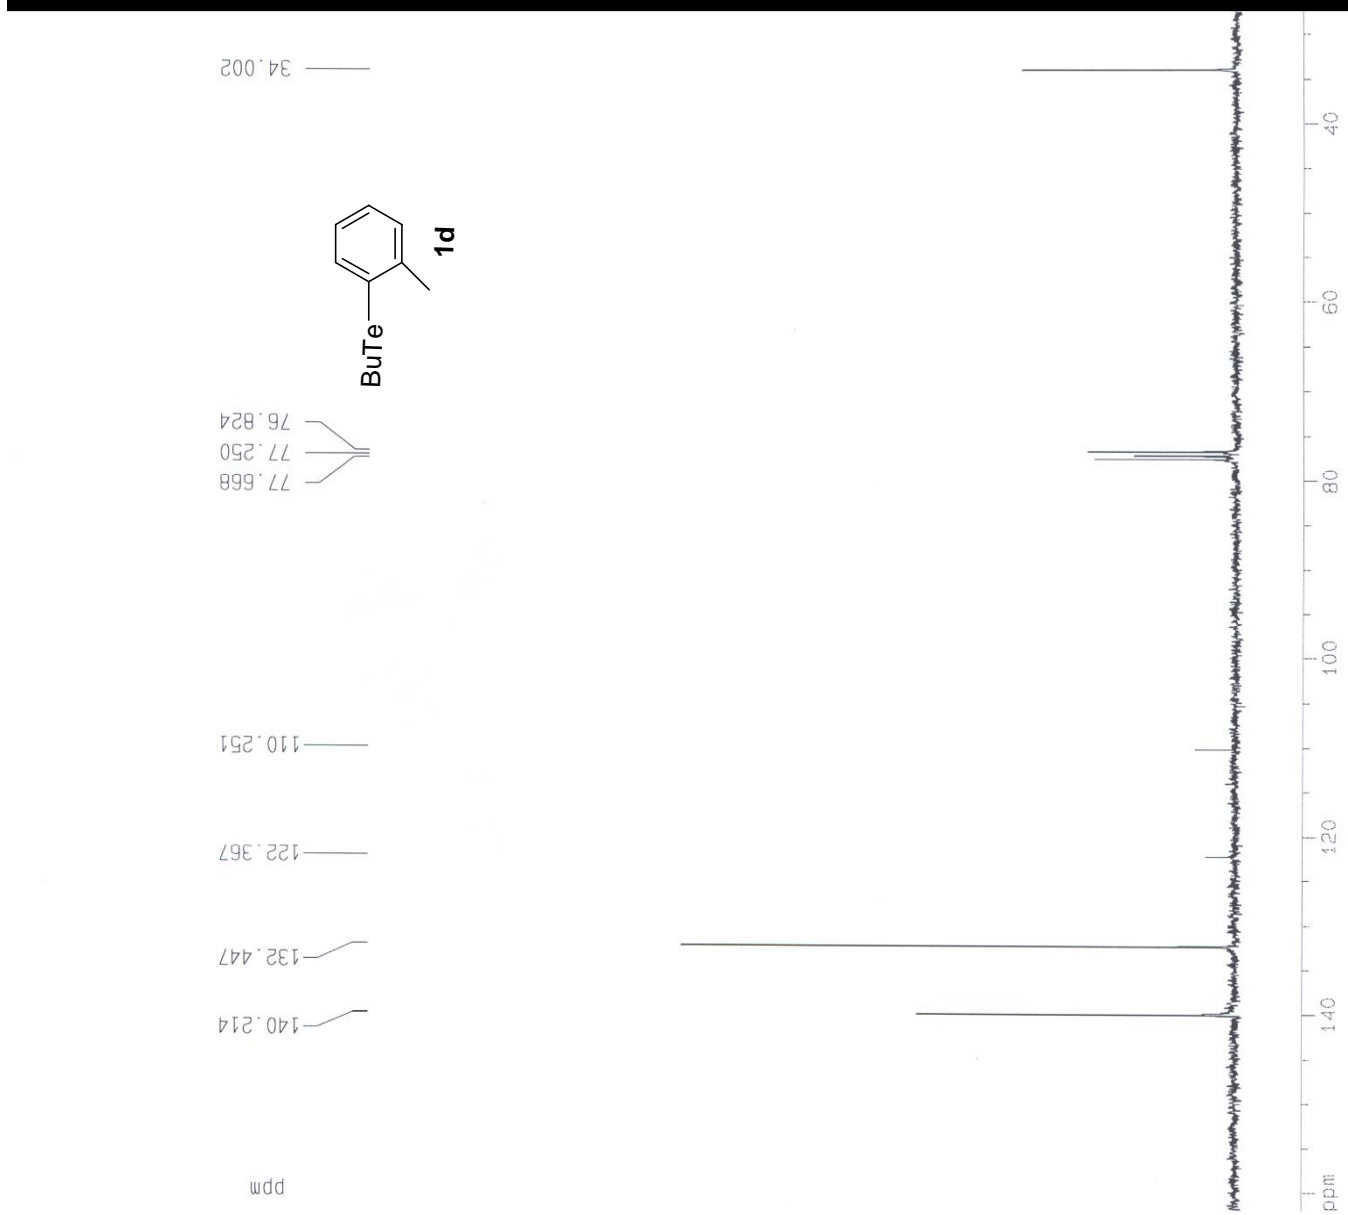

eters  
11B-c  
1  
1  
arameters  
50520  
11.56  
spect  
1nucl  
99930  
16384  
CDCl3  
1024  
4  
5.611 Hz  
97755 Hz  
55252 sec  
32768  
7.800 usec  
6.00 usec  
298.0 K  
00000 sec  
00000 sec  
00000 sec  
00000 sec  
00000 sec  
1 =====  
1 13C  
DEC  
11.00 usec  
3.00 dB  
52953 MHz  
2 =====  
1kz16  
1H  
00.00 usec  
3.00 dB  
20.08 dB  
20.08 dB  
12005 MHz  
arameters  
8192  
77347 MHz  
EM  
0  
1.00 Hz  
0  
1.40  
ters  
20.00 cm  
8.00 cm  
2.033 ppm  
28.25 Hz  
8.231 ppm  
21.20 Hz  
51320 ppm/cm  
47205 Hz/cm

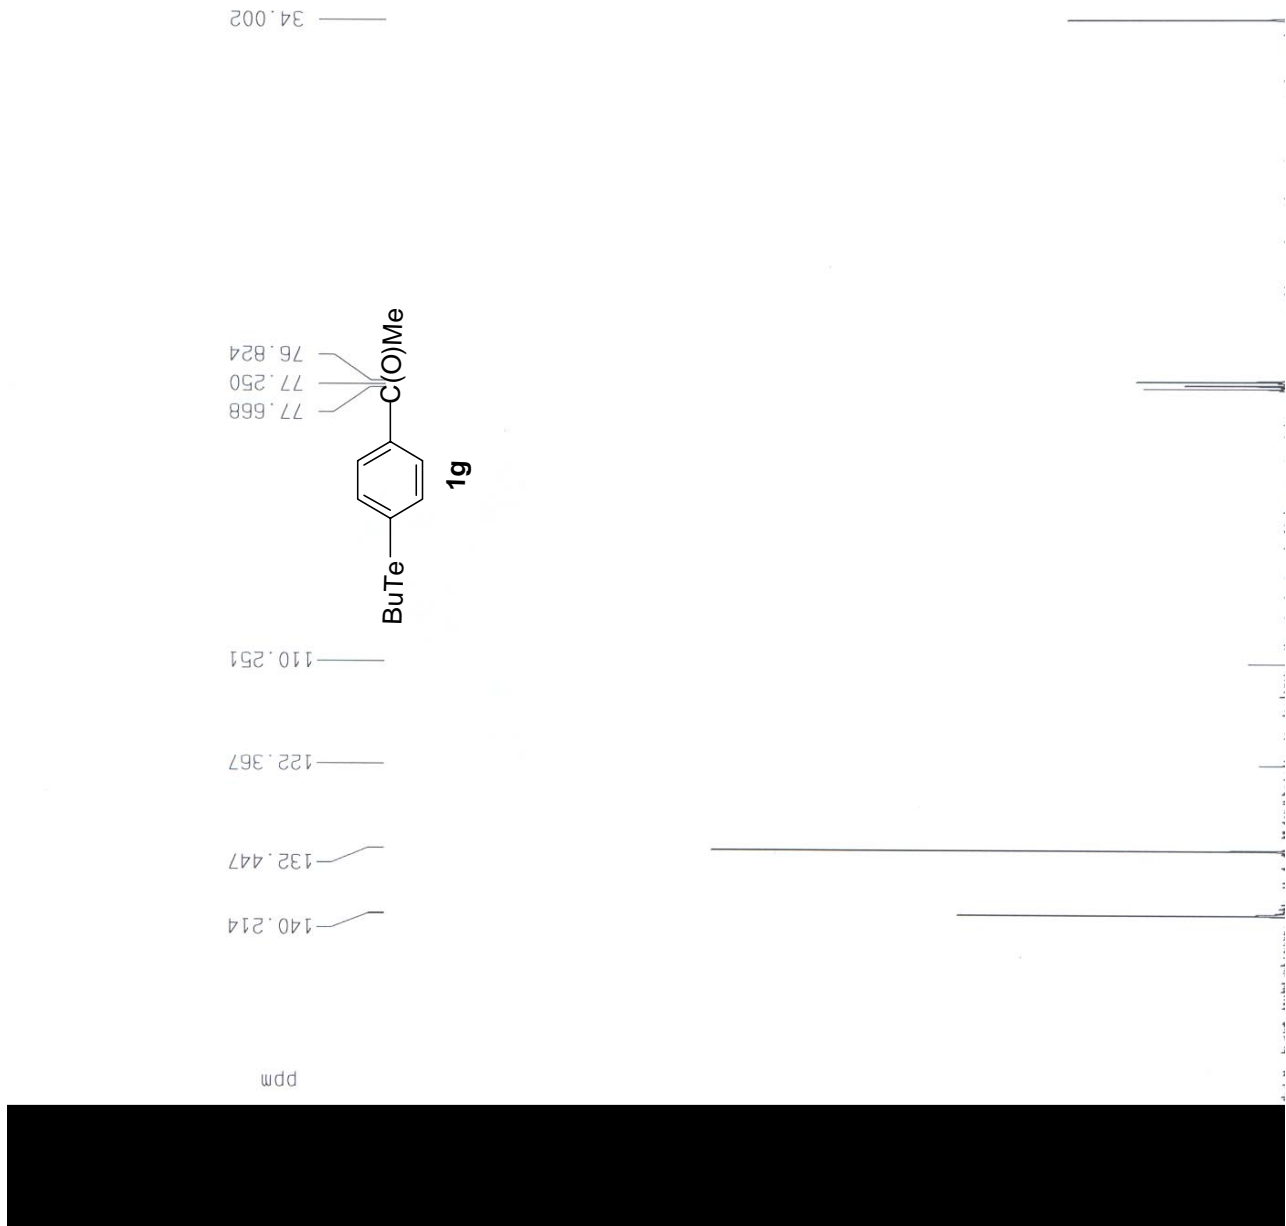

eters  
11B-c  
1  
1

arameters  
50520  
11.56  
spect  
1nuc1  
9p930  
16384  
QDC13  
1024  
4  
5.611 Hz  
97755 Hz  
55252 sec  
32768  
7.800 usec  
6.00 usec  
298.0 K  
00000 sec  
00000 sec  
00000 sec  
00000 sec  
00000 sec

1 =====  
13C  
11.00 usec  
3.00 dB  
52953 MHz

2 =====  
1t216  
1H  
00.00 usec  
3.00 dB  
20.08 dB  
20.08 dB  
12005 MHz

arameters  
8192  
77347 MHz  
EM  
0  
1.00 Hz  
0  
1.40

ters  
20.00 cm  
A 0.00 cm

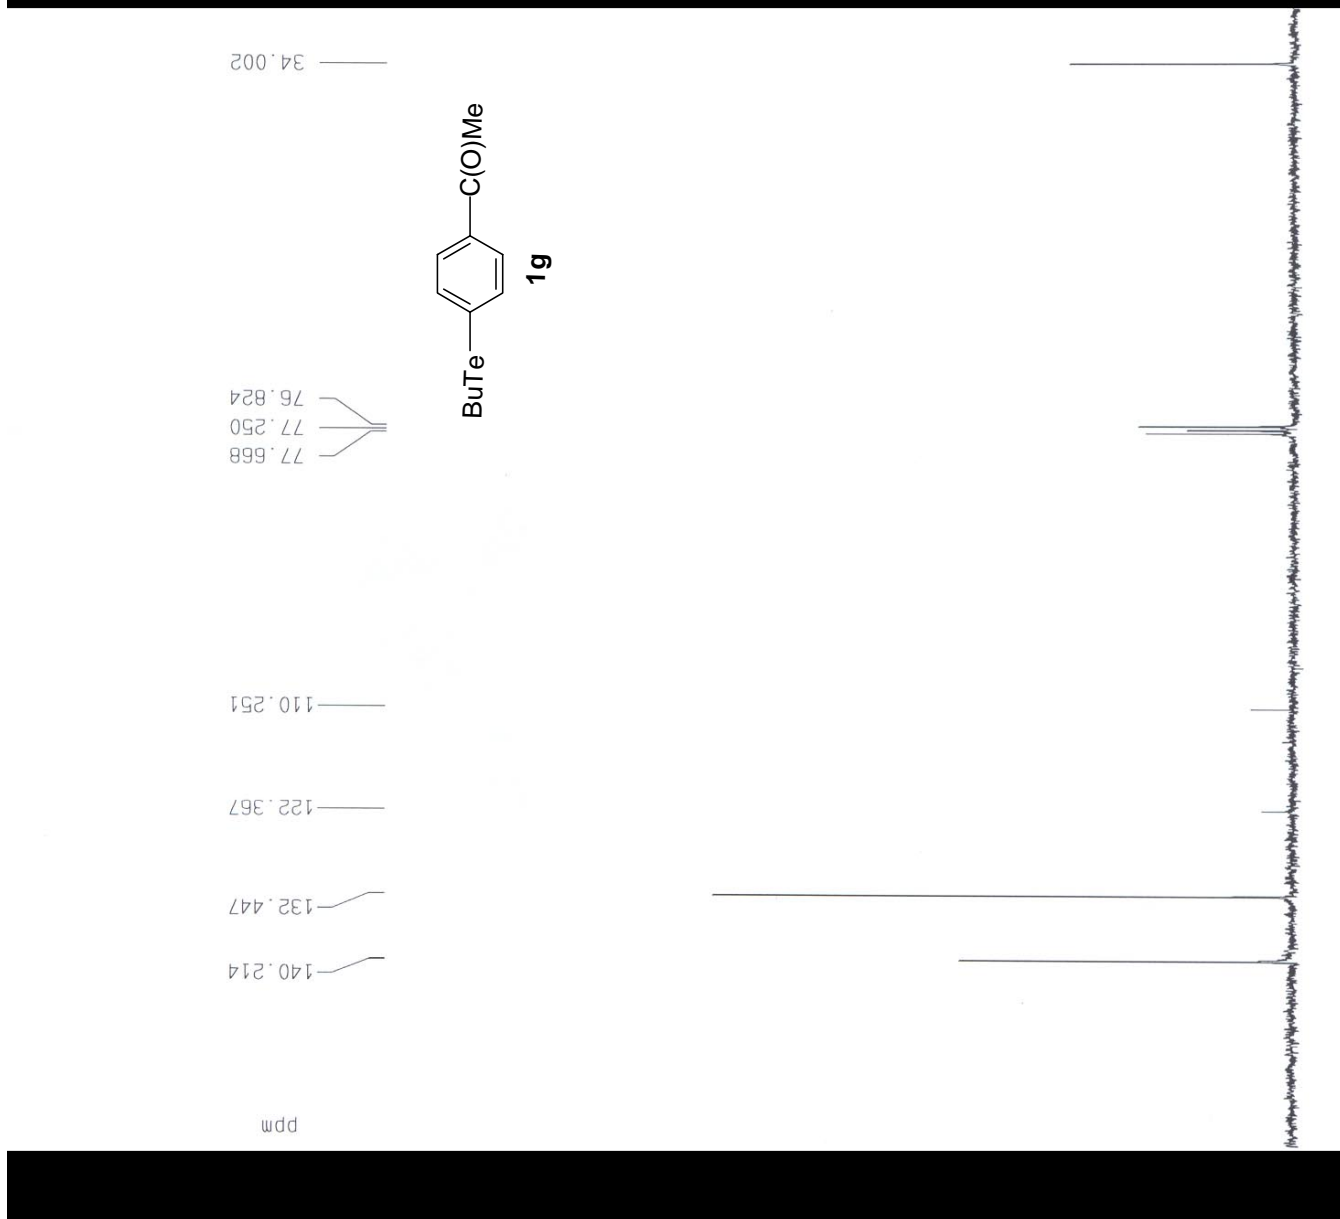

Parameters

|            |       |
|------------|-------|
| 1          | ===== |
| 13C        |       |
| 11.00 usec |       |
| 3.00 dB    |       |
| 52953 MHz  |       |
| 2          | ===== |
| 1t216      |       |
| 1H         |       |
| 00.00 usec |       |
| 3.00 dB    |       |
| 20.08 dB   |       |
| 20.08 dB   |       |
| 12005 MHz  |       |
| Parameters |       |
| 8162       |       |
| 77347 MHz  |       |
| EM         |       |
| 0          |       |
| 1.00 Hz    |       |
| 0          |       |
| 1.40       |       |
| Parameters |       |
| 20.00 cm   |       |
| 8.00 cm    |       |
| 2.033 ppm  |       |
| 28.25 Hz   |       |
| 8 291 nm   |       |

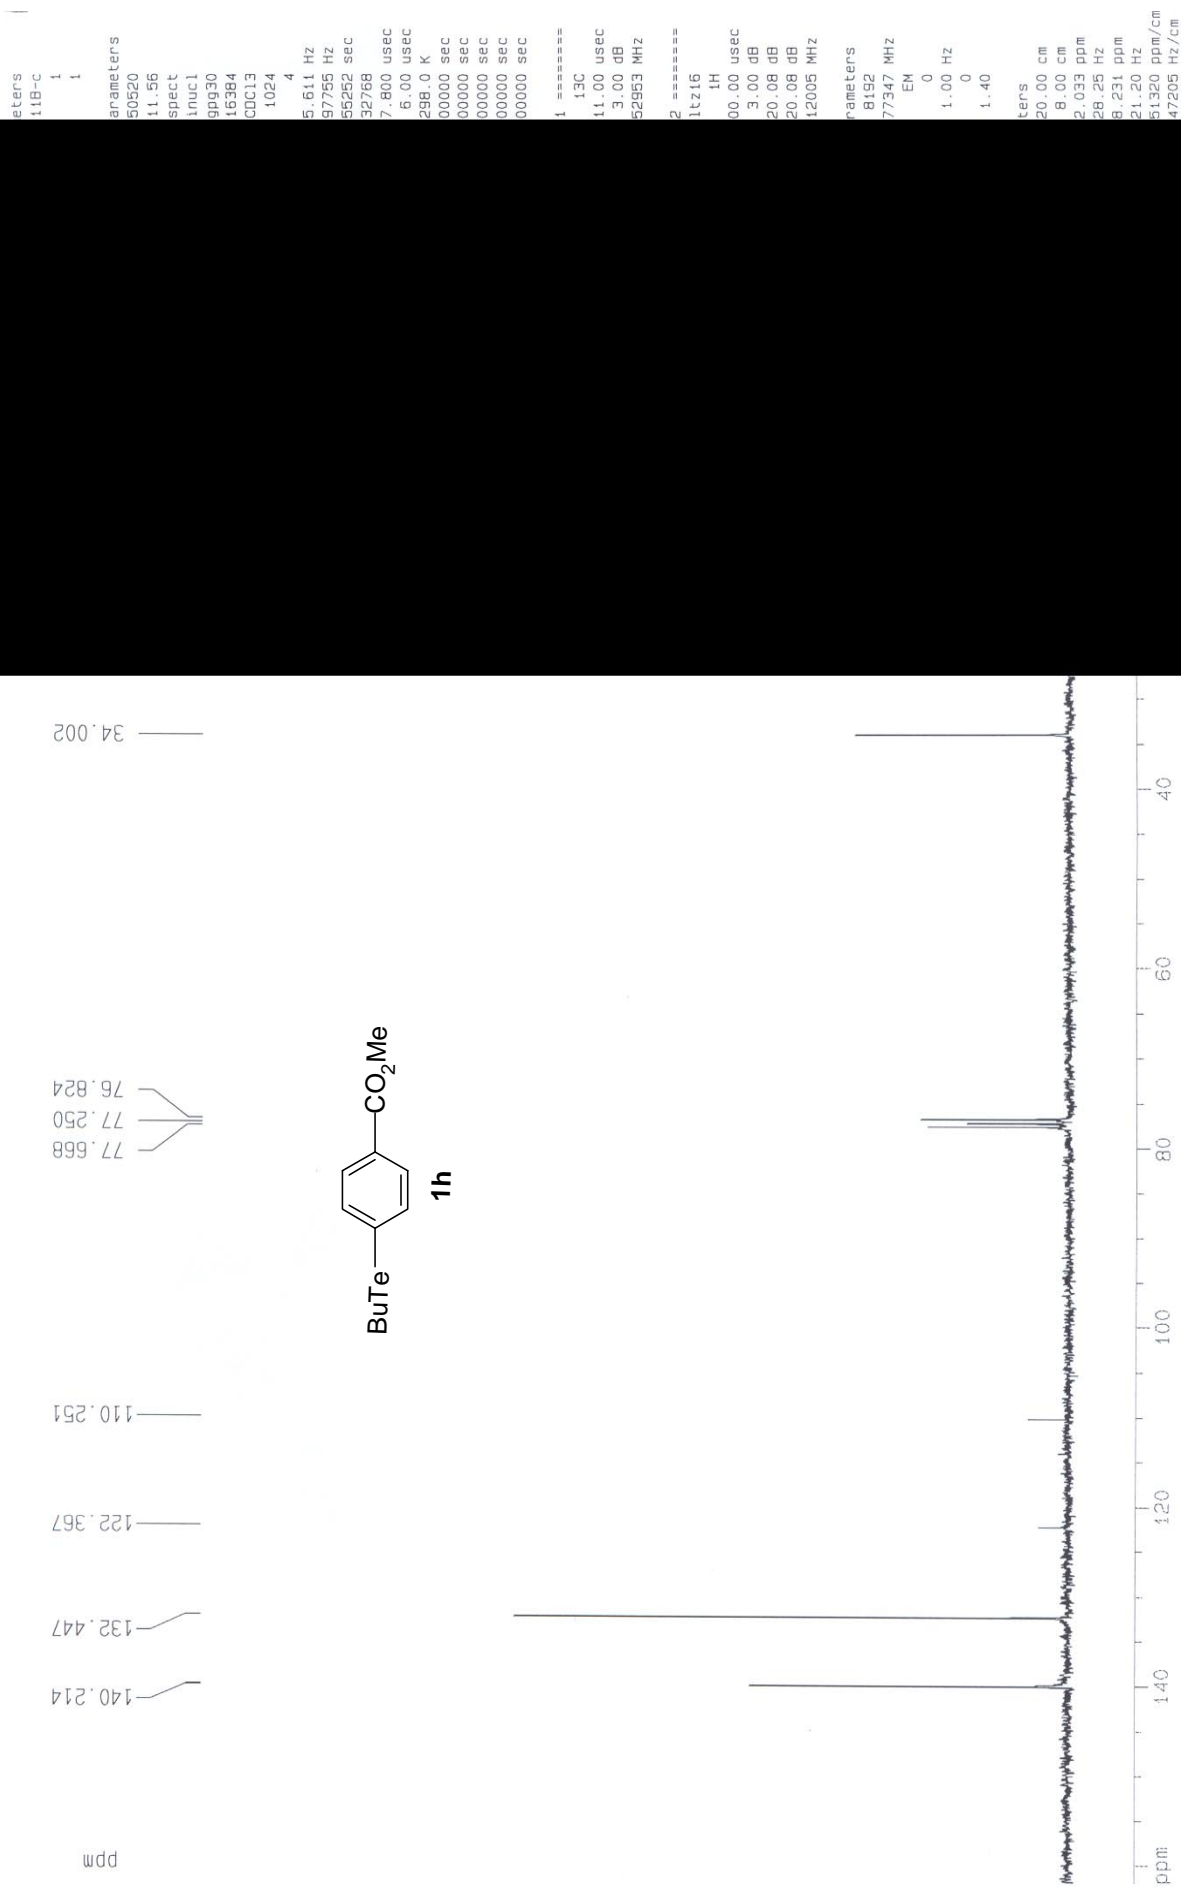

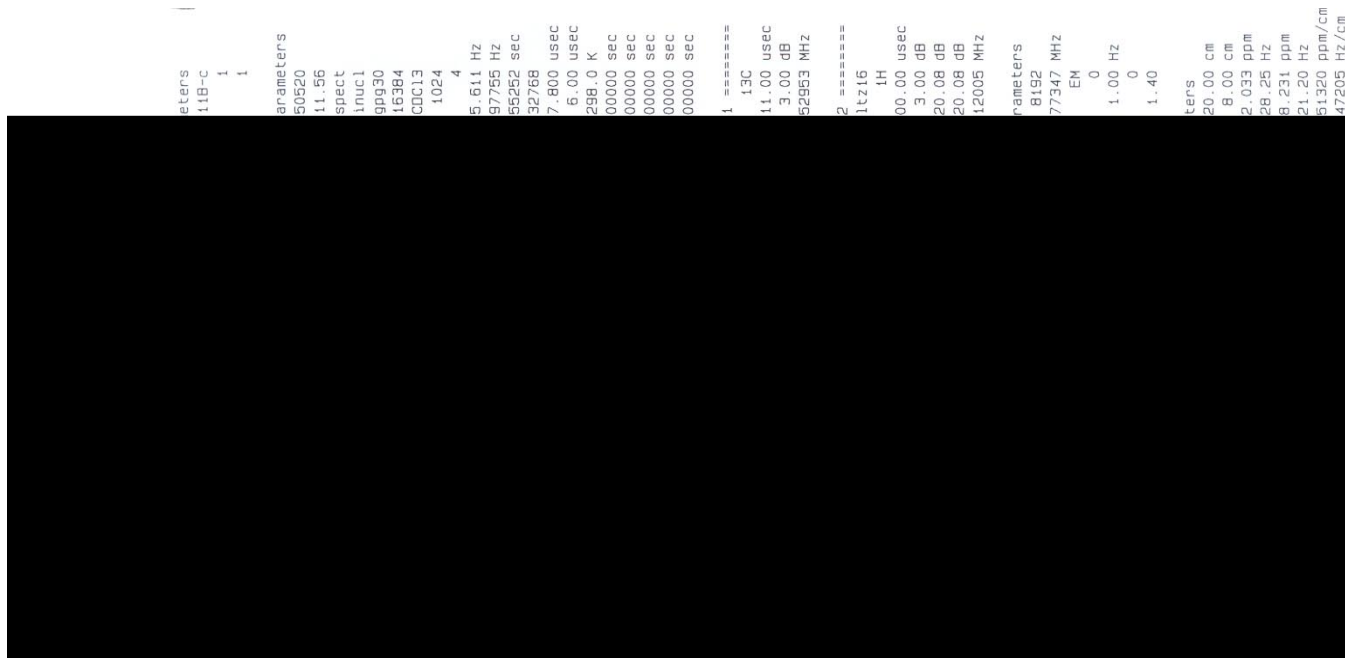

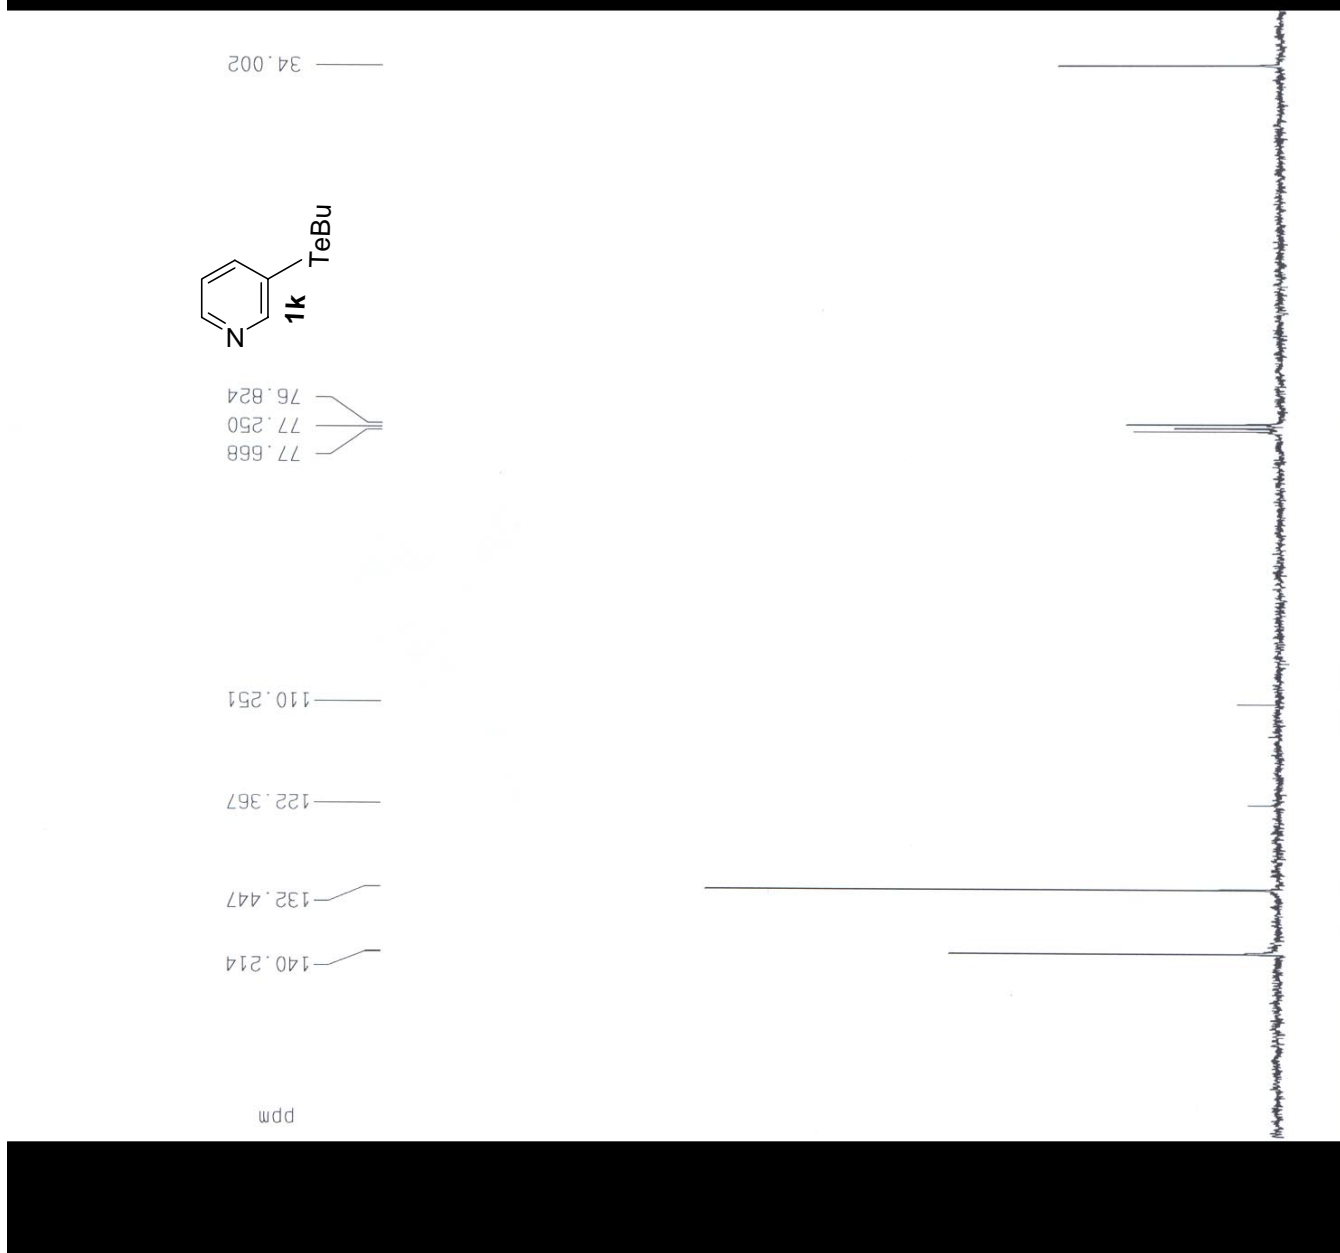

Parameters  
 1 13C  
 11.00 usec  
 3.00 dB  
 52953 MHz  
 2 =====  
 1t216  
 1H  
 00.00 usec  
 3.00 dB  
 20.08 dB  
 20.08 dB  
 12005 MHz  
 Parameters  
 8192  
 77347 MHz  
 EN  
 0  
 1.00 Hz  
 0  
 1.40  
 Parameters  
 20.00 cm  
 8.00 cm  
 2.033 ppm  
 28.25 Hz  
 8.231 ppm

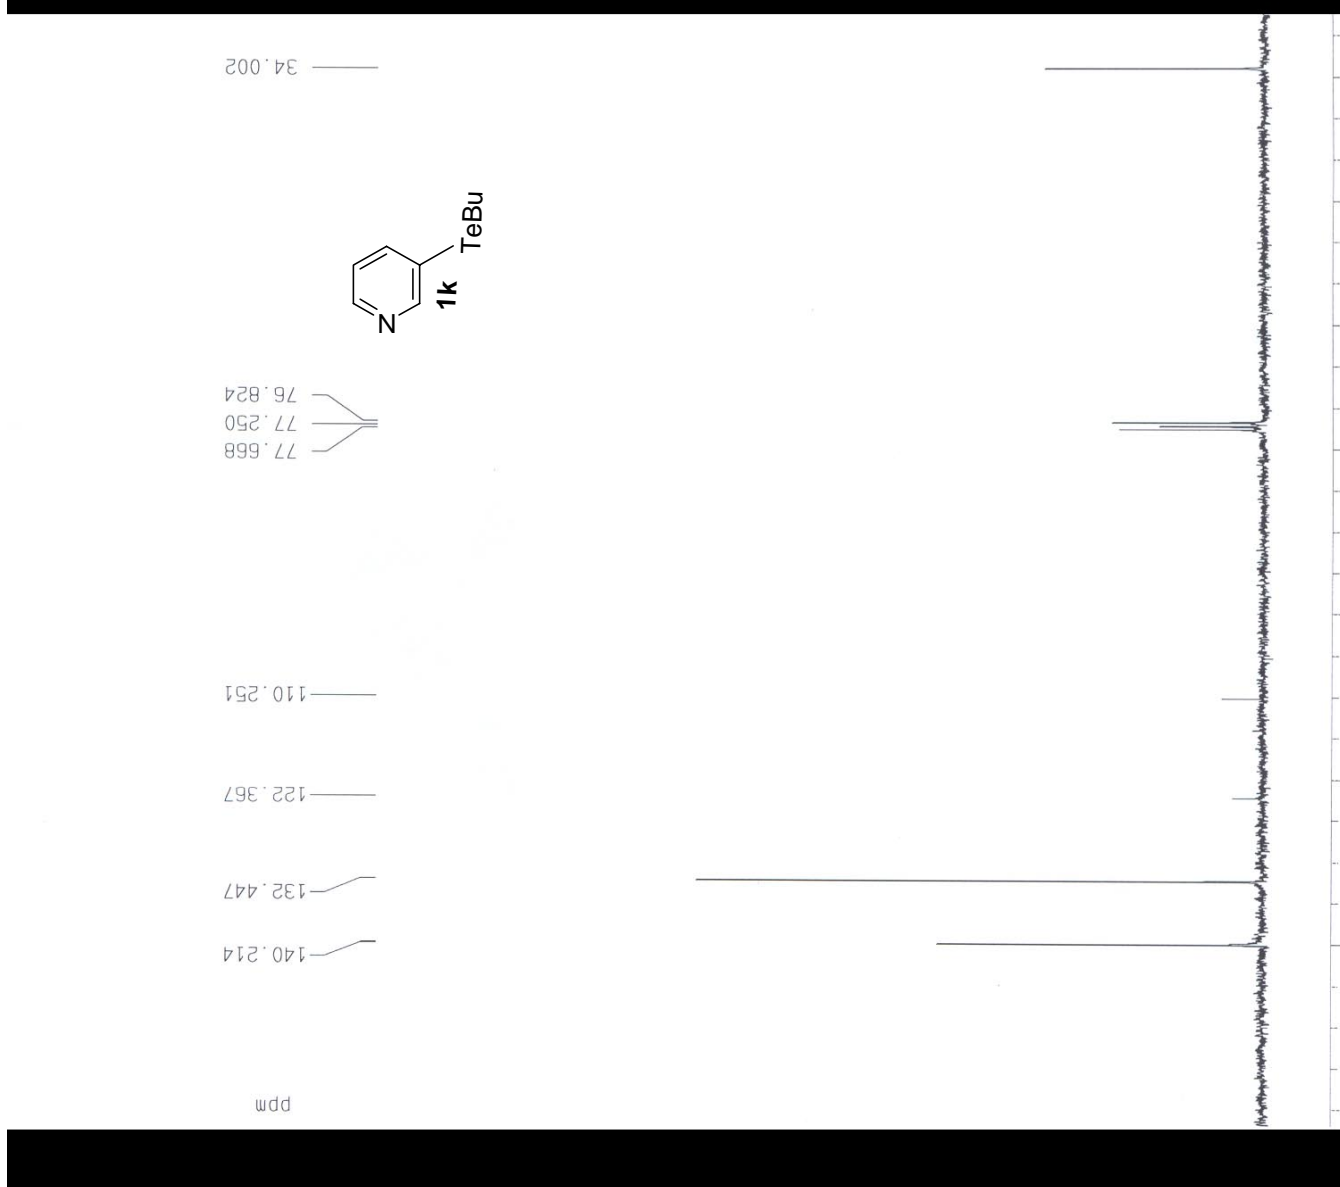

eters  
 11B-C  
 1  
 1  
 parameters  
 50520  
 11.56  
 spect  
 inucl  
 90830  
 16384  
 CDCl<sub>3</sub>  
 1024  
 4  
 5.611 Hz  
 97755 Hz  
 55252 sec  
 32768  
 7.800 usec  
 6.00 usec  
 298.0 K  
 00000 sec  
 00000 sec  
 00000 sec  
 00000 sec  
 00000 sec  
 00000 sec  
 1  
 13C  
 11.00 usec  
 3.00 dB  
 52853 MHz  
 2  
 1tzt16  
 1H  
 00.00 usec  
 3.00 dB  
 20.08 dB  
 20.08 dB  
 12005 MHz  
 parameters  
 8192  
 77347 MHz  
 EM  
 0  
 1.00 Hz  
 0  
 1.40  
 ters  
 20.00 cm  
 8.00 cm  
 2.033 ppm  
 28.25 Hz  
 8.231 ppm  
 21.20 Hz

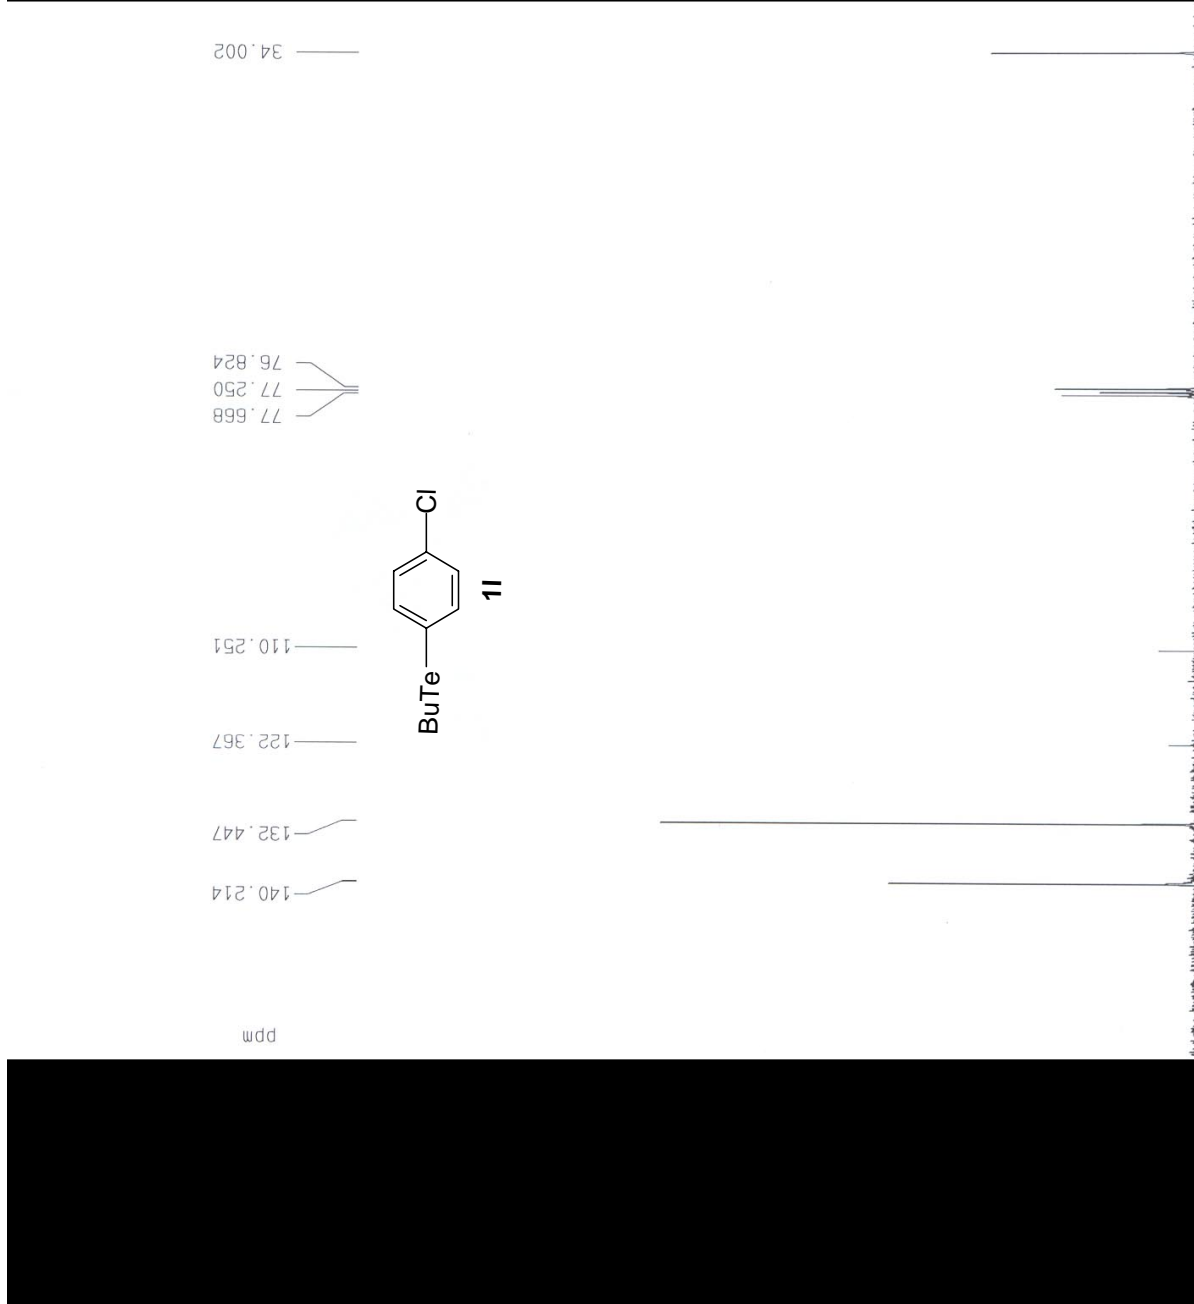

Parameters

11B-C

1

1

Parameters

50520

11.56

spect

inuc1

99930

16384

CC13

1024

4

5.611 Hz

97755 Hz

55252 sec

32768

7.800 usec

6.00 usec

298.0 K

00000 sec

00000 sec

00000 sec

00000 sec

00000 sec

1 =====

13C

11.00 usec

3.00 dB

52953 MHz

2 =====

11z16

1H

00.00 usec

3.00 dB

20.08 dB

20.08 dB

12005 MHz

Parameters

8192

77347 MHz

EM

0

1.00 Hz

0

1.40

Parameters

20.00 cm

8.00 cm

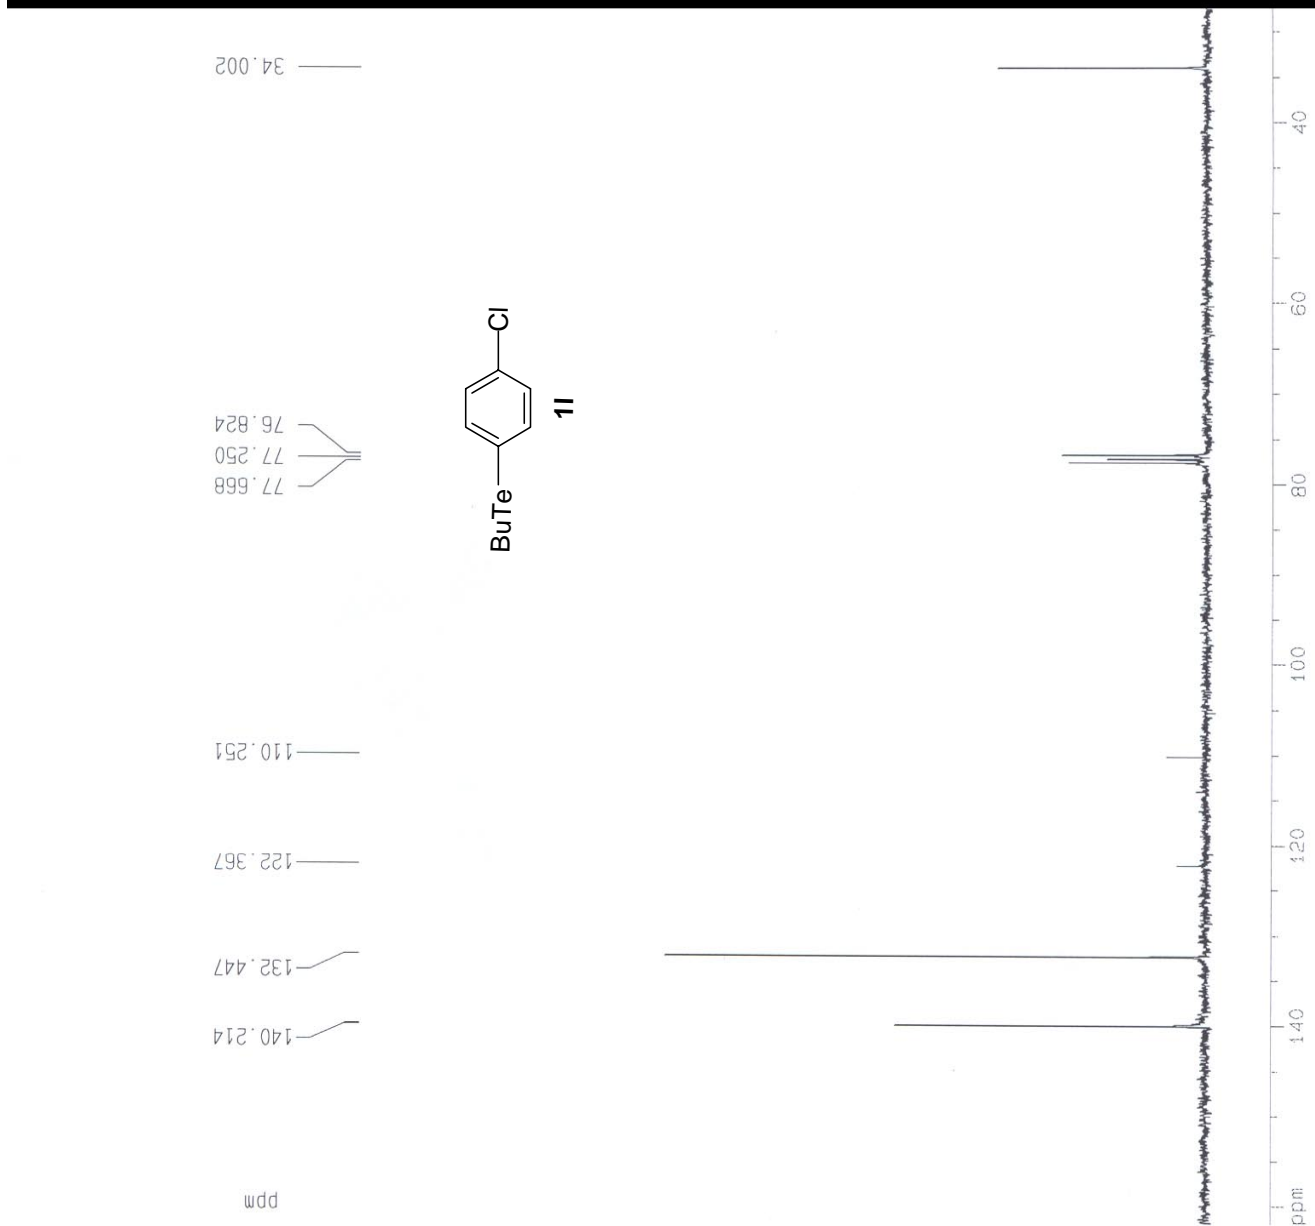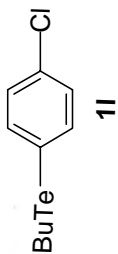

```

=====
Parameters
1B-C 1
1
1
=====
Parameters
50520
11.56
spect
Incl
ppg30
15384
CUC13
1024
4
5.611 Hz
9.7755 Hz
55252 sec
32768
7.800 usec
6.00 usec
258.0 K
00000 sec
00000 sec
00000 sec
00000 sec
00000 sec
00000 sec
=====
2 =====
1tz16
1H
00.00 usec
3.00 dB
20.08 dB
20.08 dB
20.08 dB
12005 MHz
Parameters
8192
777347 MHz
EM
0
1.00 Hz
0
1.40
Parameters
20.00 cm
8.00 cm
2.033 ppm
28.25 Hz
8.231 ppm
21.20 Hz
47205 Hz/cm

```

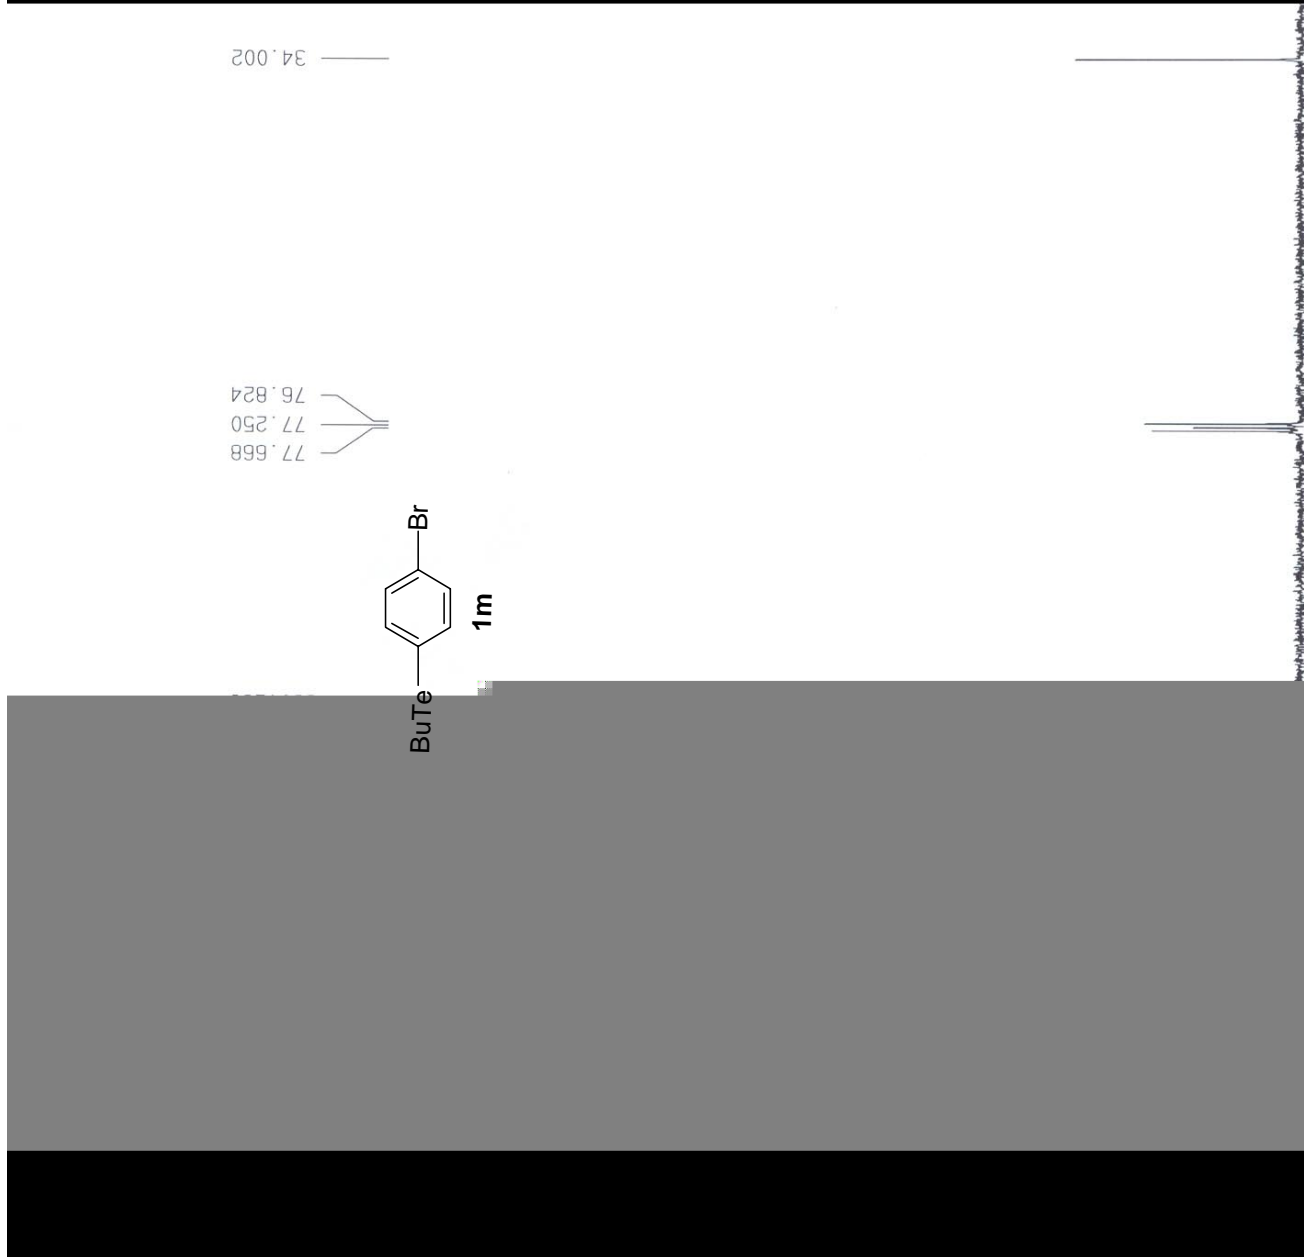

Parameters

|            |       |
|------------|-------|
| 1          | ===== |
| 13C        |       |
| 11.00 usec |       |
| 3.00 dB    |       |
| 52953 MHz  |       |
| 2          | ===== |
| 1t216      |       |
| 1H         |       |
| 00.00 usec |       |
| 3.00 dB    |       |
| 20.08 dB   |       |
| 20.08 dB   |       |
| 12005 MHz  |       |
| Parameters |       |
| 8192       |       |
| 77347 MHz  |       |
| EM         |       |
| 0          |       |
| 1.00 Hz    |       |
| 0          |       |
| 1.40       |       |
| Parameters |       |
| 20.00 cm   |       |
| 8.00 cm    |       |

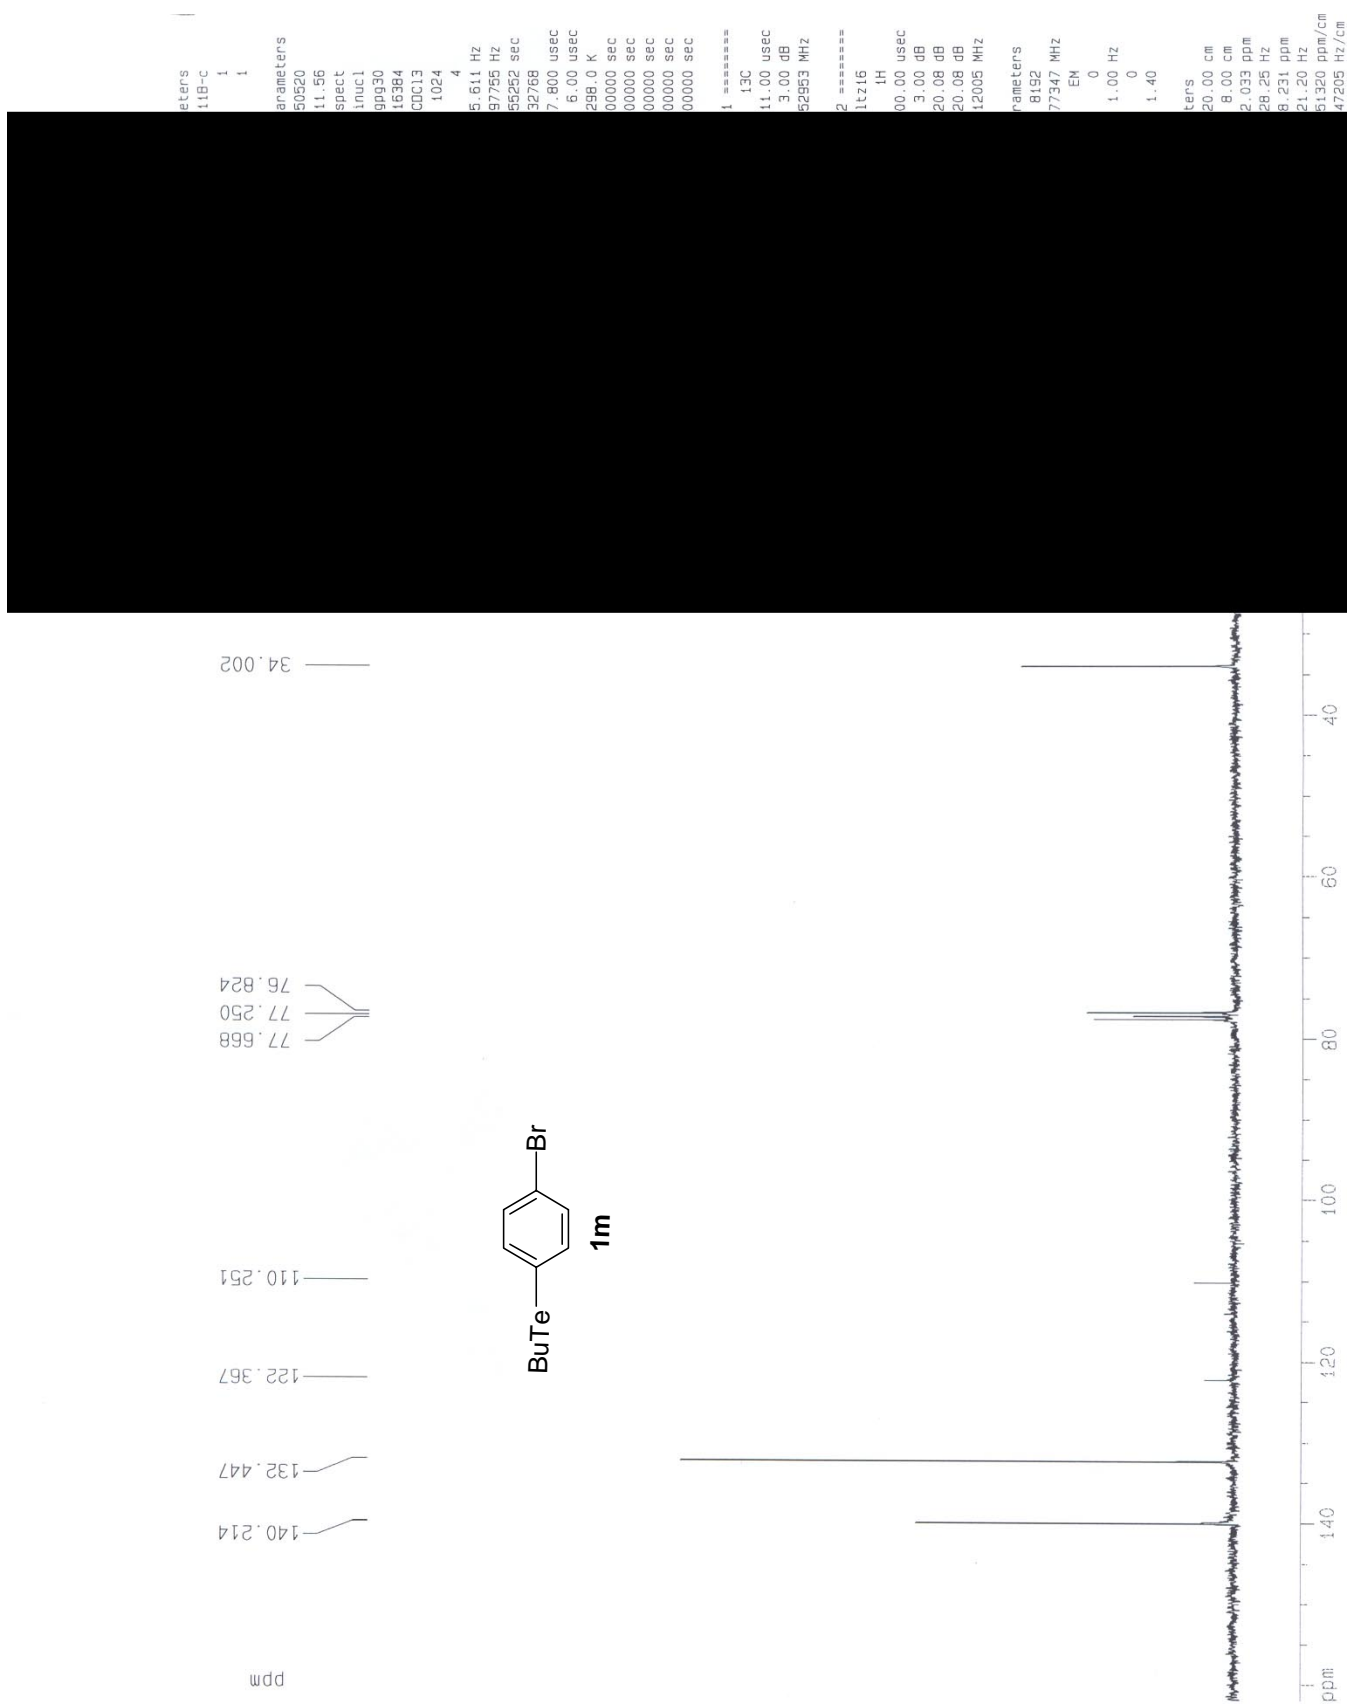

Current Data Parameters  
NAME rcdtip1h  
EXPNO 1  
PROCNO 1

F2 - Acquisition Parameters

Date\_ 20050930  
Time 9.12  
INSTRUM spect  
PROBHD 5 mm Multinucl  
PULPROG zg30  
TD 65536  
SOLVENT CDCl3  
NS 16  
DS 2  
SWH 6172.839 Hz  
FIDRES 0.094190 Hz  
AQ 5.3084660 sec  
RG 4  
DM 81.000 usec  
DE 6.00 usec  
TE 298.0 K  
D1 1.00000000 sec  
MCREST 0.00000000 sec  
MCWRK 0.01500000 sec

===== CHANNEL f1 =====

NUC1 1H  
P1 14.00 usec  
PL1 3.00 dB  
SF01 300.1318534 MHz

F2 - Processing parameters

SI 32768  
SF 300.1300123 MHz  
WDW no  
SSB 0  
LB 0.00 Hz  
GB 0  
PC 1.00  
1D NMR plot parameters  
CX 20.00 cm  
CY 12.50 cm  
F1P 10.072 ppm  
F1 3023.04 Hz  
F2P -0.311 ppm  
F2 -93.34 Hz  
PPMCM 0.51917 ppm/cm  
HZCM 155.81926 Hz/cm

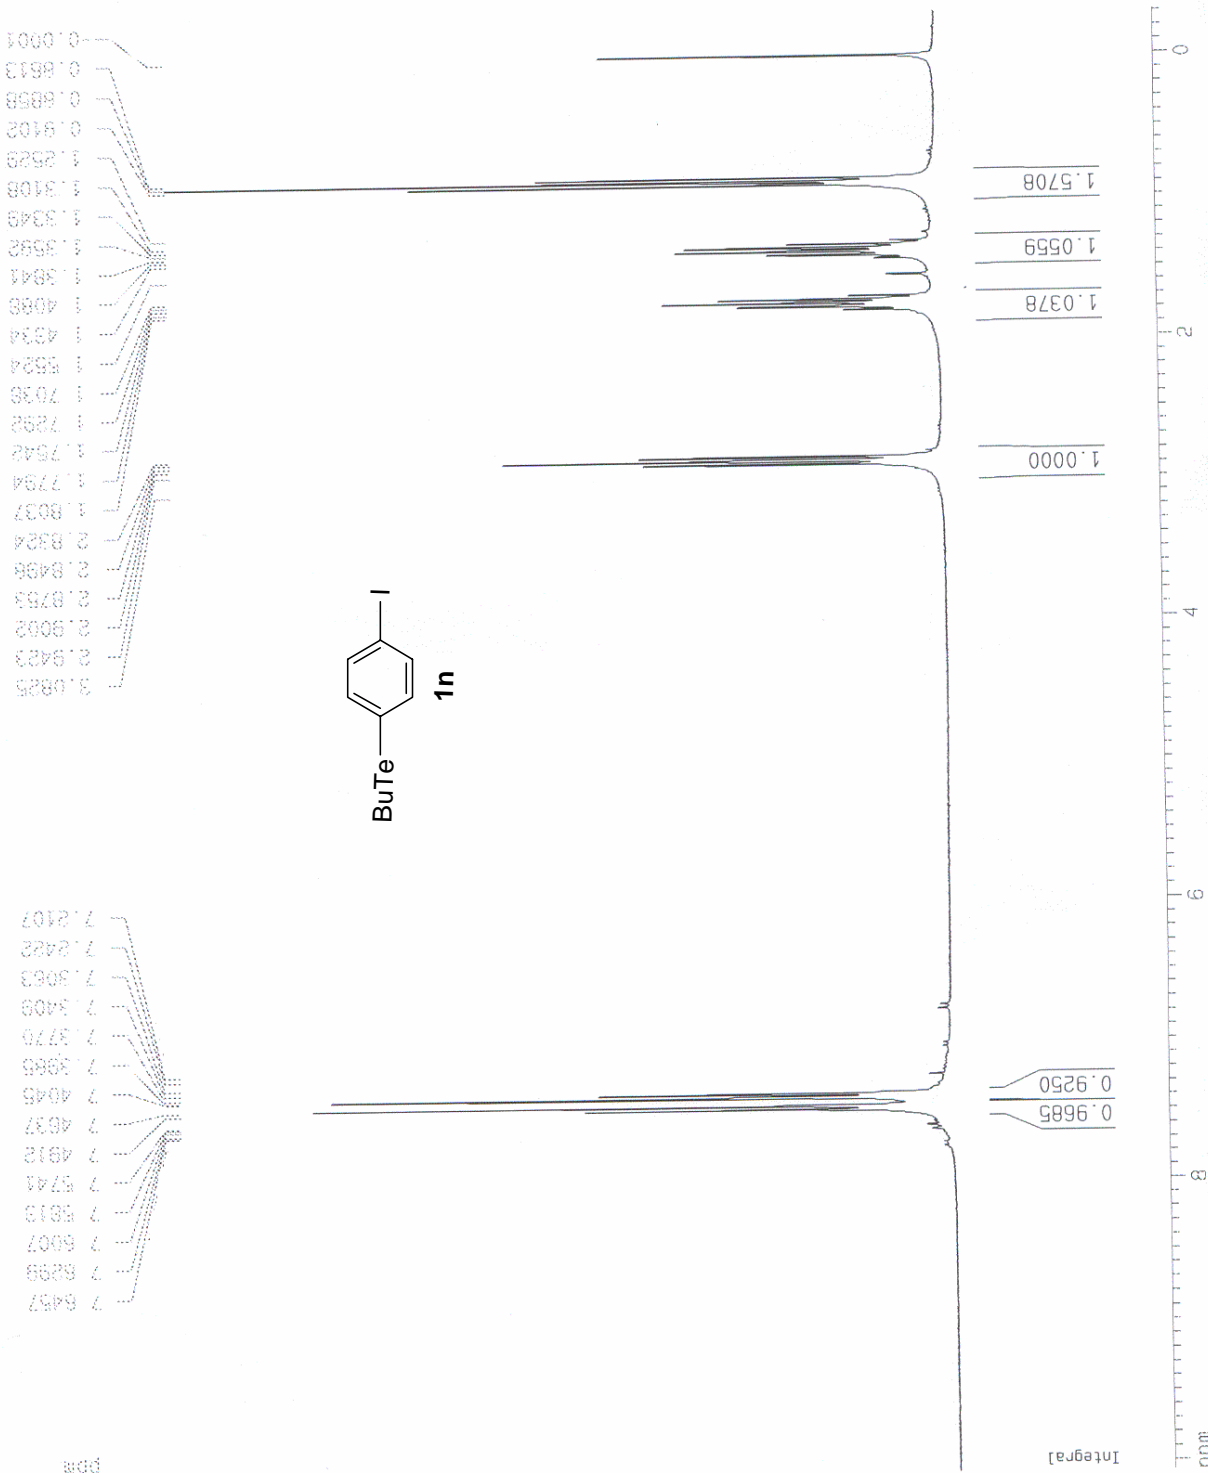

Current Data Parameters  
 NAME rctelodoc  
 EXPNO 1  
 PROCNO 1

F2 - Acquisition Parameters  
 Date\_ 20050930  
 Time 8.24  
 INSTRUM spect  
 PROBHD 5 mm Multinucl  
 PULPROG zgpg  
 TO 65636  
 SOLVENT CDCl3  
 NS 821  
 DS 4  
 SWH 17985.611 Hz  
 FIDRES 0.274439 Hz  
 AQ 1.8219508 sec  
 RG 16384  
 DM 27.800 usec  
 DE 6.00 usec  
 TE 298.0 K  
 O1 1.00000000 sec  
 d11 0.03000000 sec  
 DELTA 0.89999998 sec  
 MCREST 0.00000000 sec  
 MCWRK 0.01500000 sec

===== CHANNEL f1 =====  
 NUC1 13C  
 P1 11.00 usec  
 PL1 3.00 dB  
 SF01 75.4752953 MHz

===== CHANNEL f2 =====  
 CPDPRG2 waltz16  
 NUC2 1H  
 PCPD2 100.00 usec  
 PL2 3.00 dB  
 PL12 20.08 dB  
 PL13 20.08 dB  
 SF02 300.1312005 MHz

F2 - Processing parameters  
 SI 32768  
 SF 75.4677602 MHz  
 WDW EM  
 SSB 0  
 LB 1.00 Hz  
 GB 0  
 PC 1.40

1D NMR plot parameters  
 CX 20.00 cm  
 CY 12.50 cm  
 FIP 200.387 ppm  
 F1 15122.76 Hz  
 F2P -5.284 ppm  
 F2 -398.80 Hz  
 PPMCH 10.28357 ppm/cm  
 HZCM 776.07825 Hz/cm

0.000  
 7.836  
 8.832  
 9.828  
 13.356  
 24.889  
 24.588  
 33.467  
 39.718

111.135  
 69.850  
 77.444  
 77.021  
 76.597

139.798  
 139.689  
 139.612  
 139.498  
 139.200  
 136.581  
 136.305  
 136.001  
 137.593

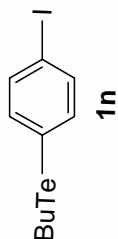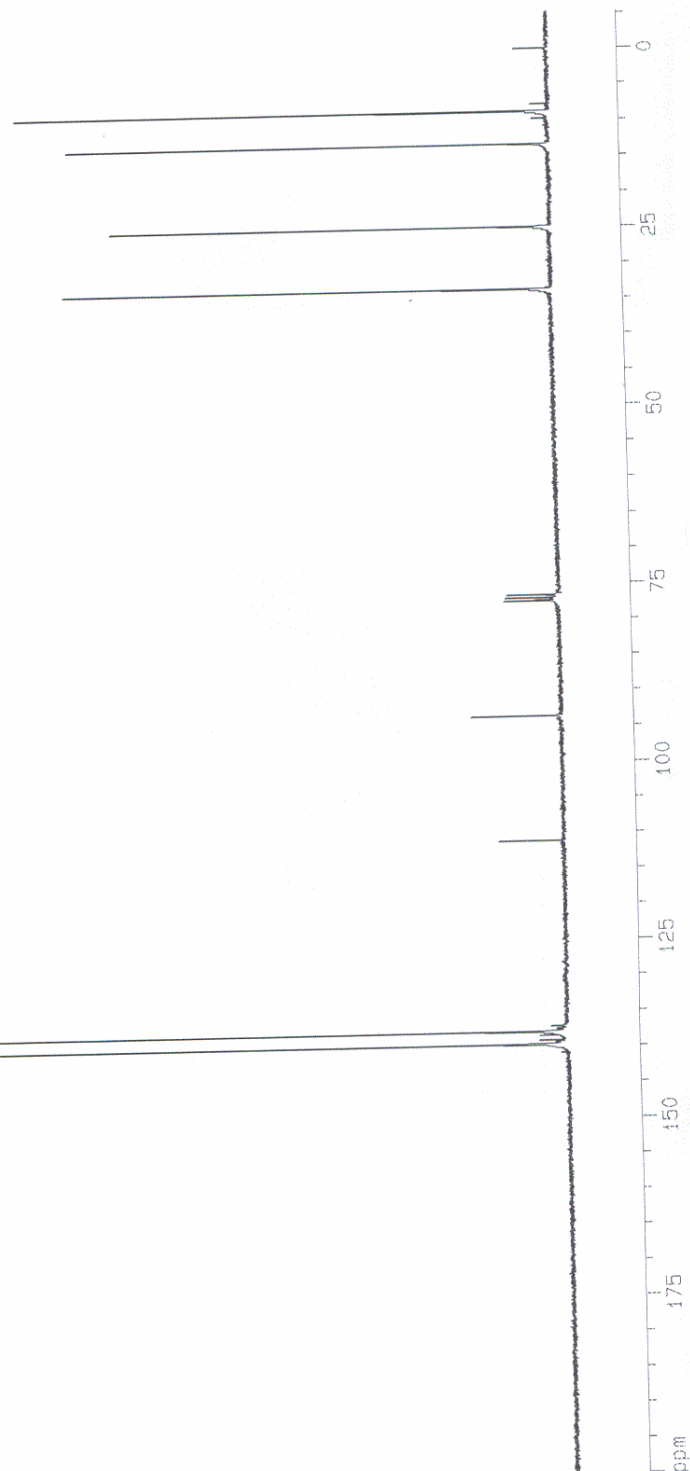



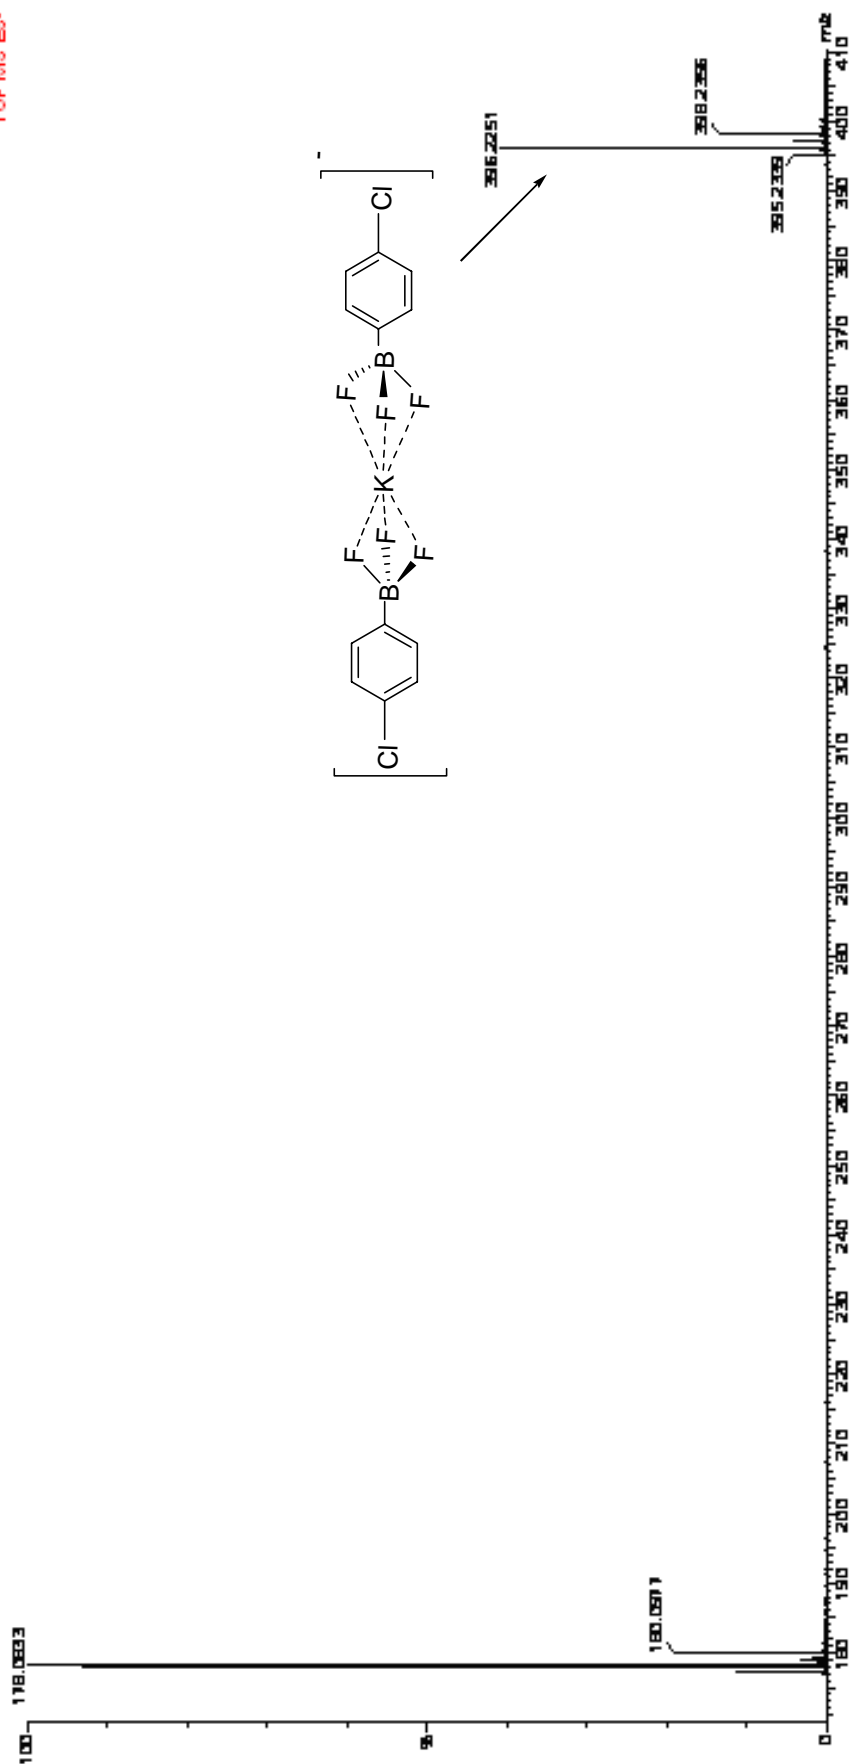

TOF MS ES-

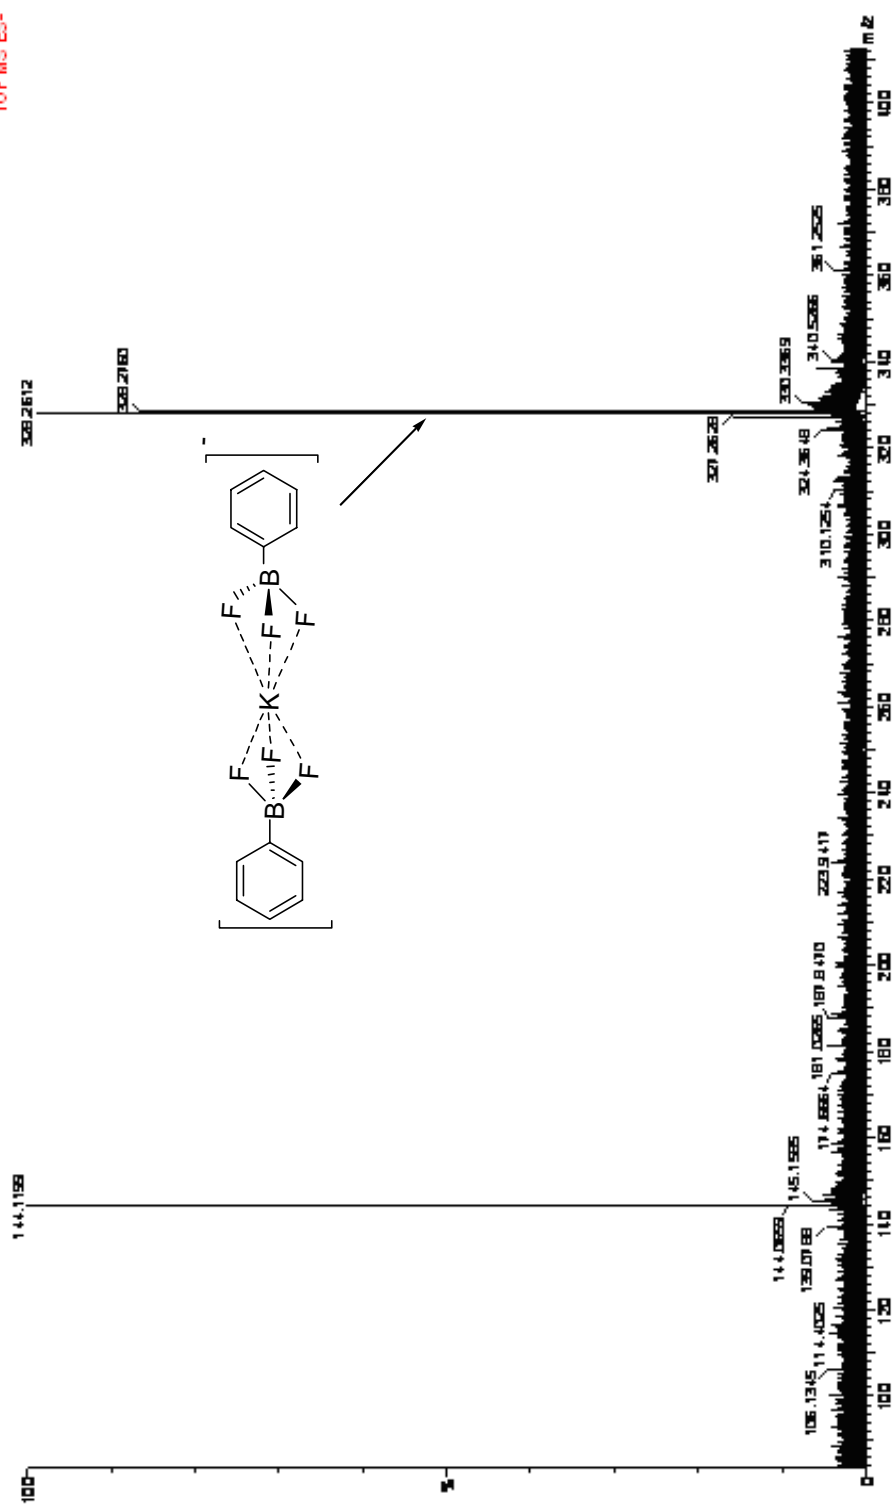

TOF MS ES-

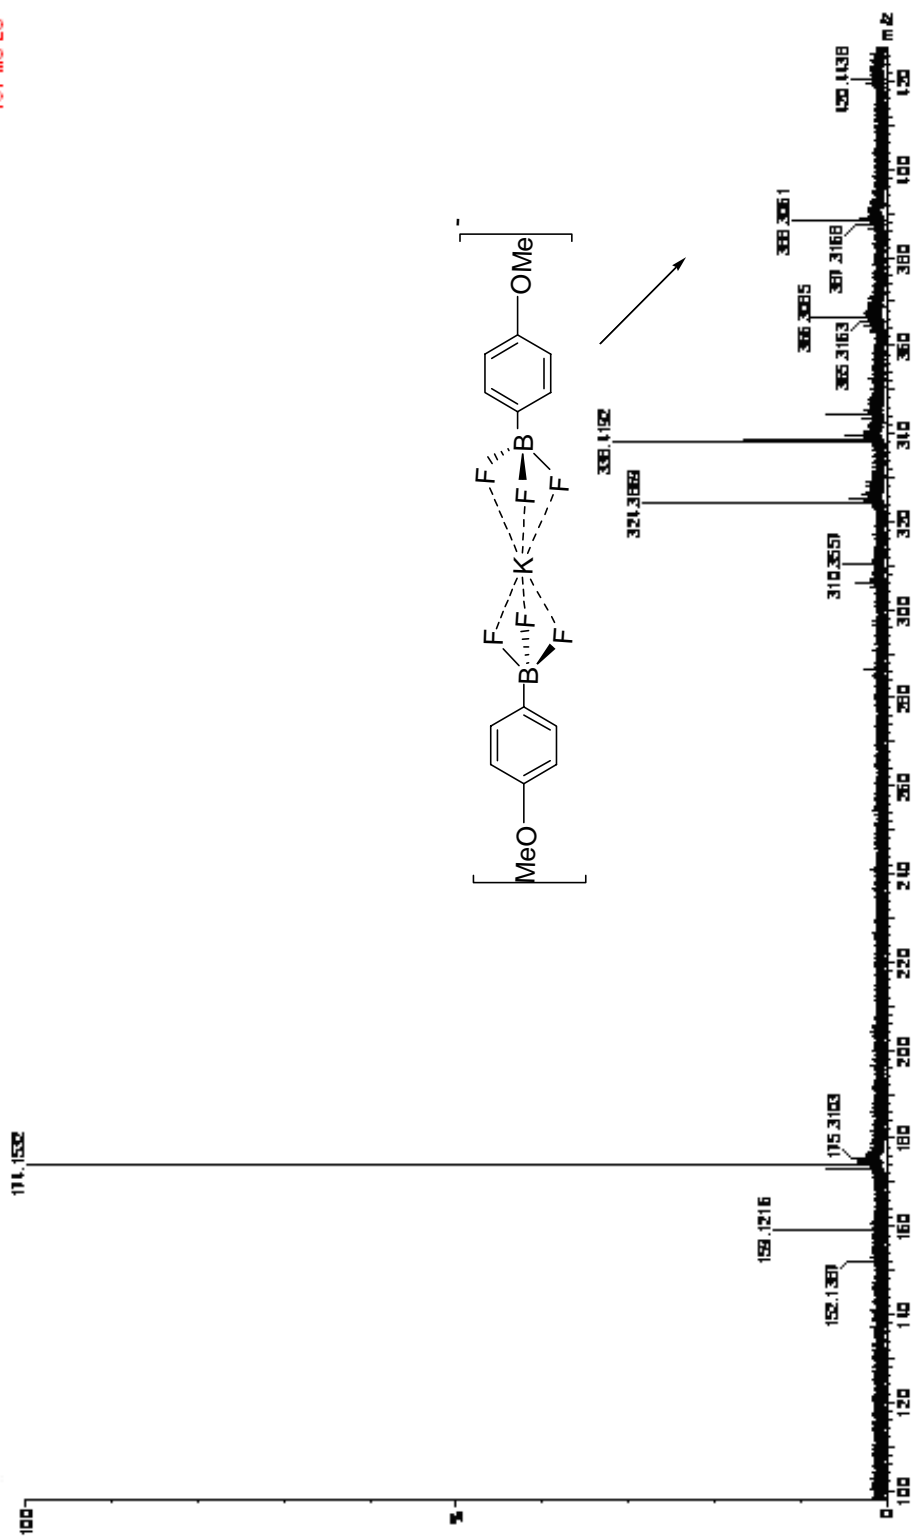

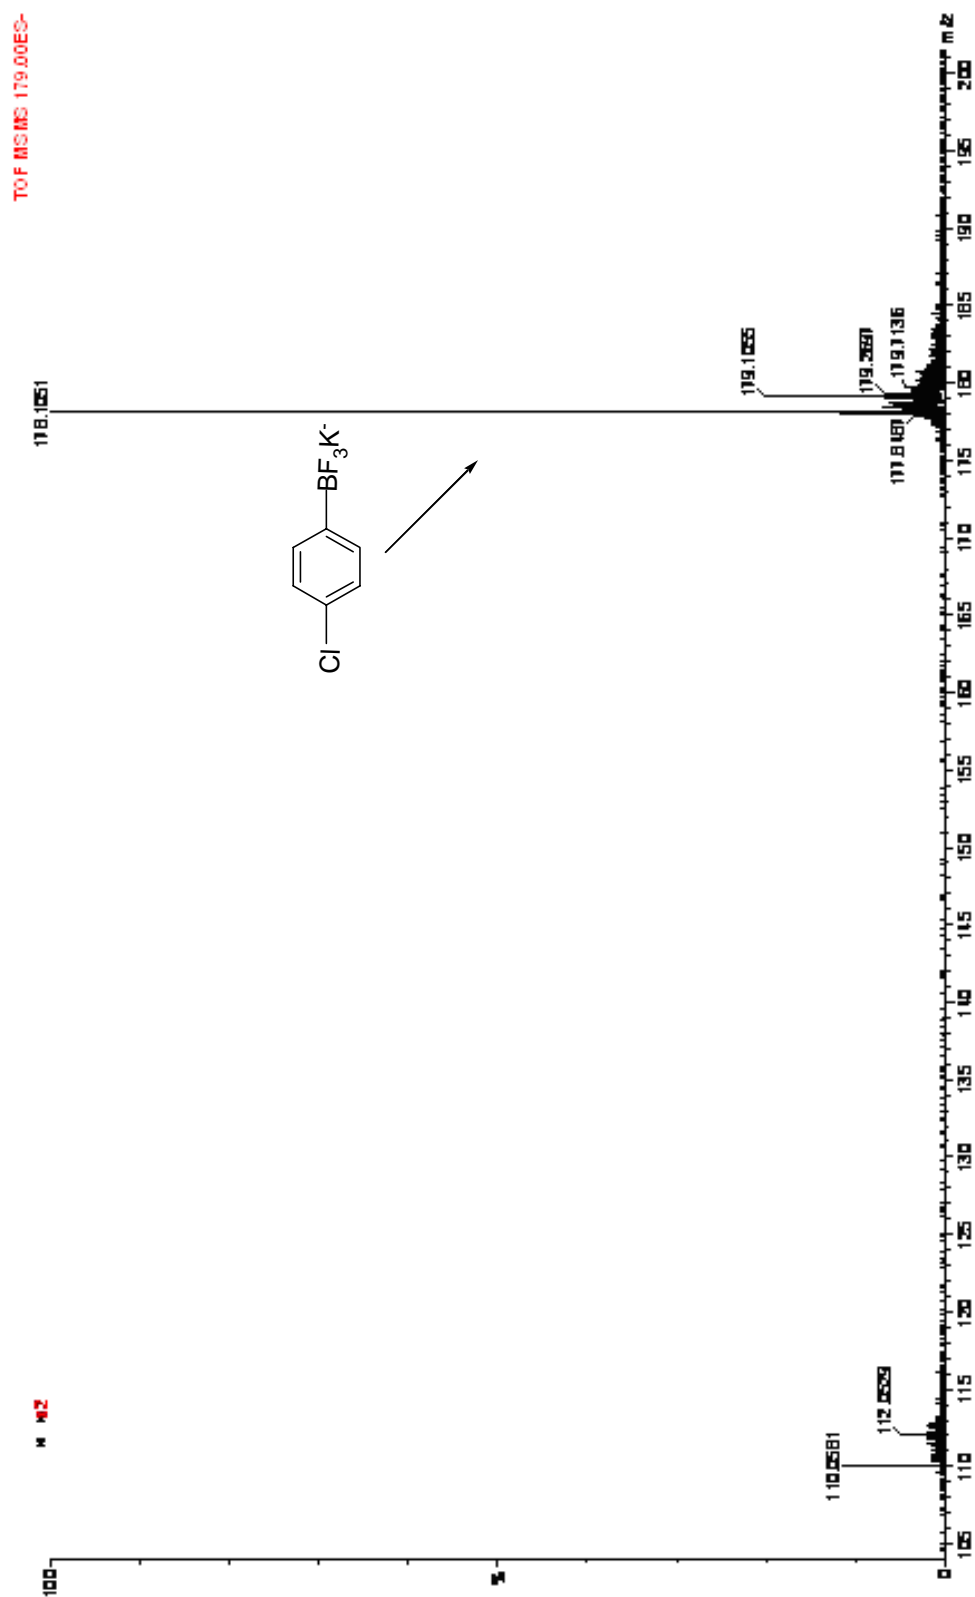

TOF MS MS 389.0060

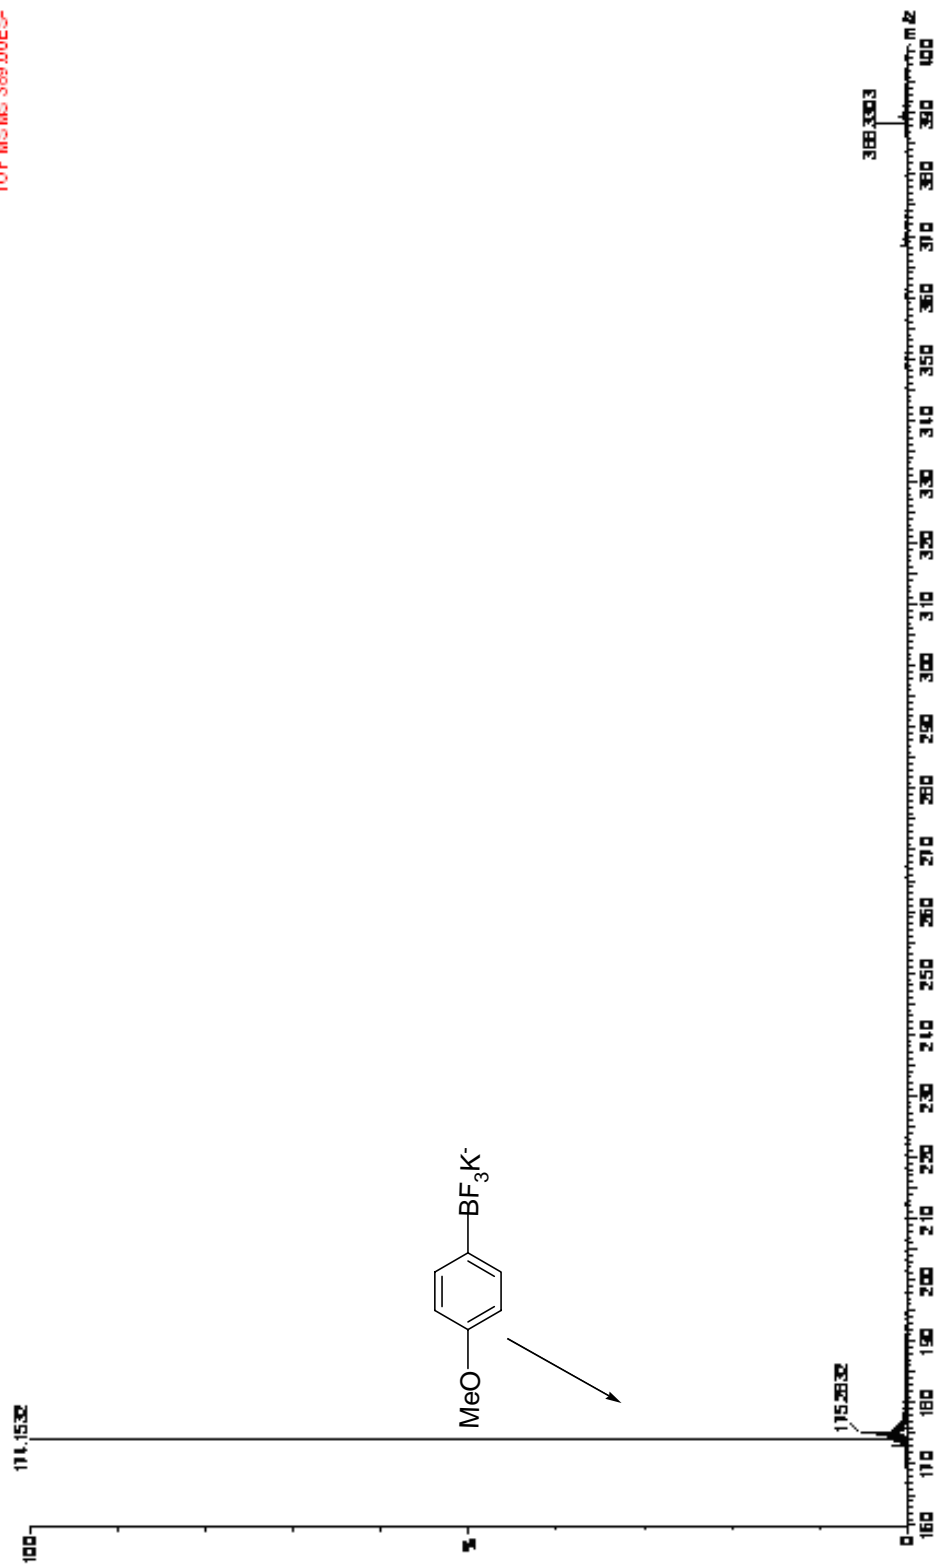

TOF MS MS 329.0069-

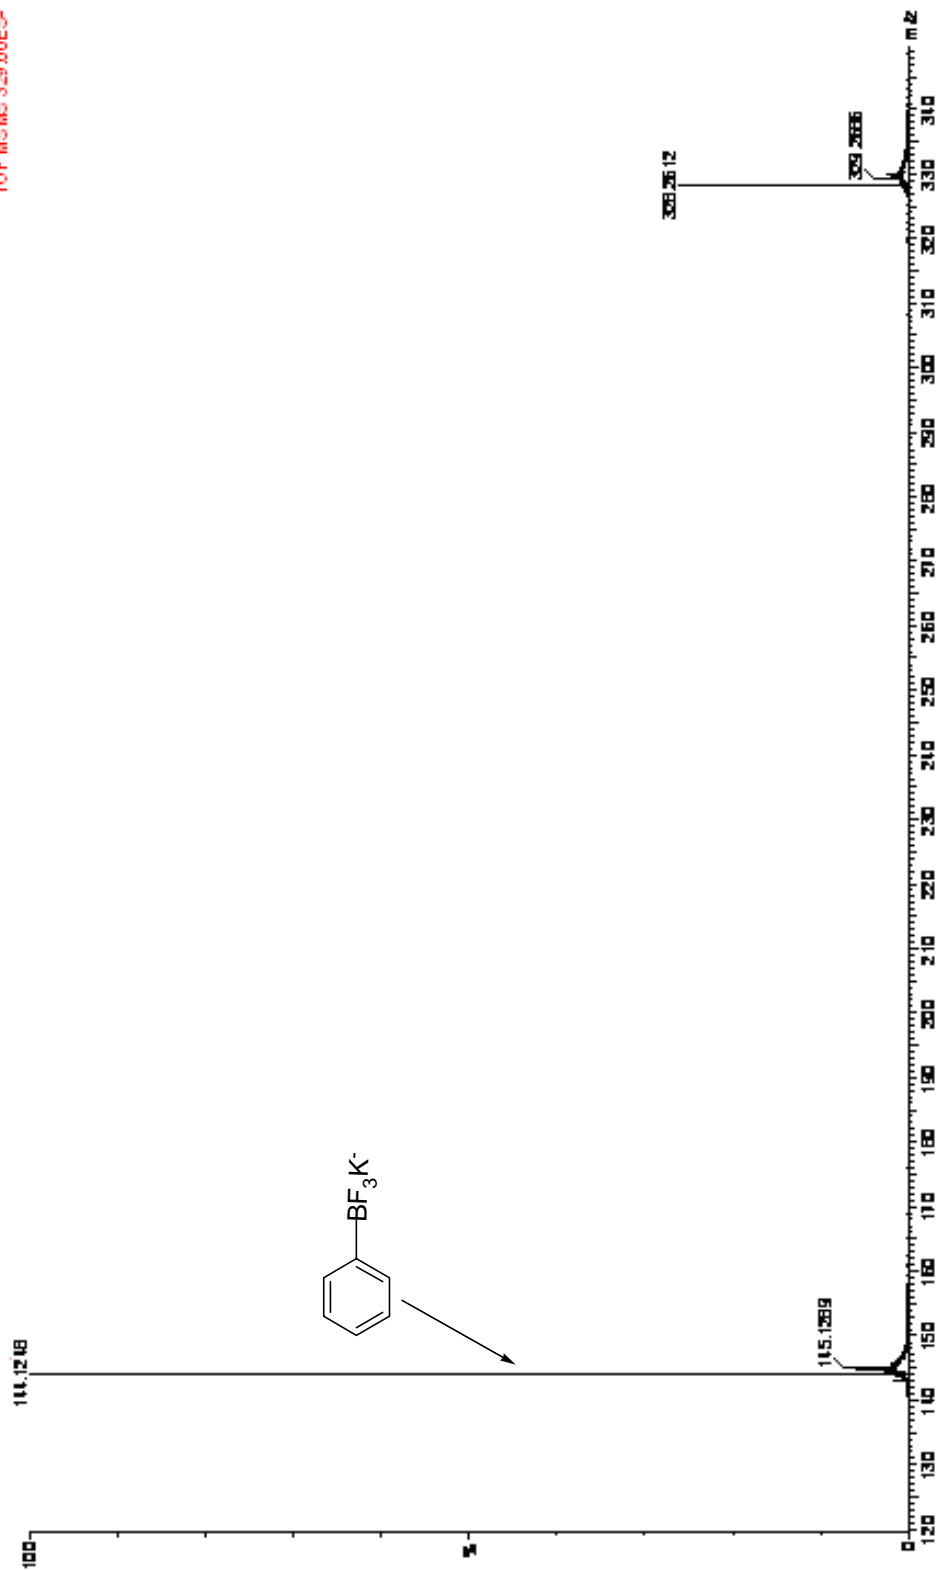

TO F MS ES+

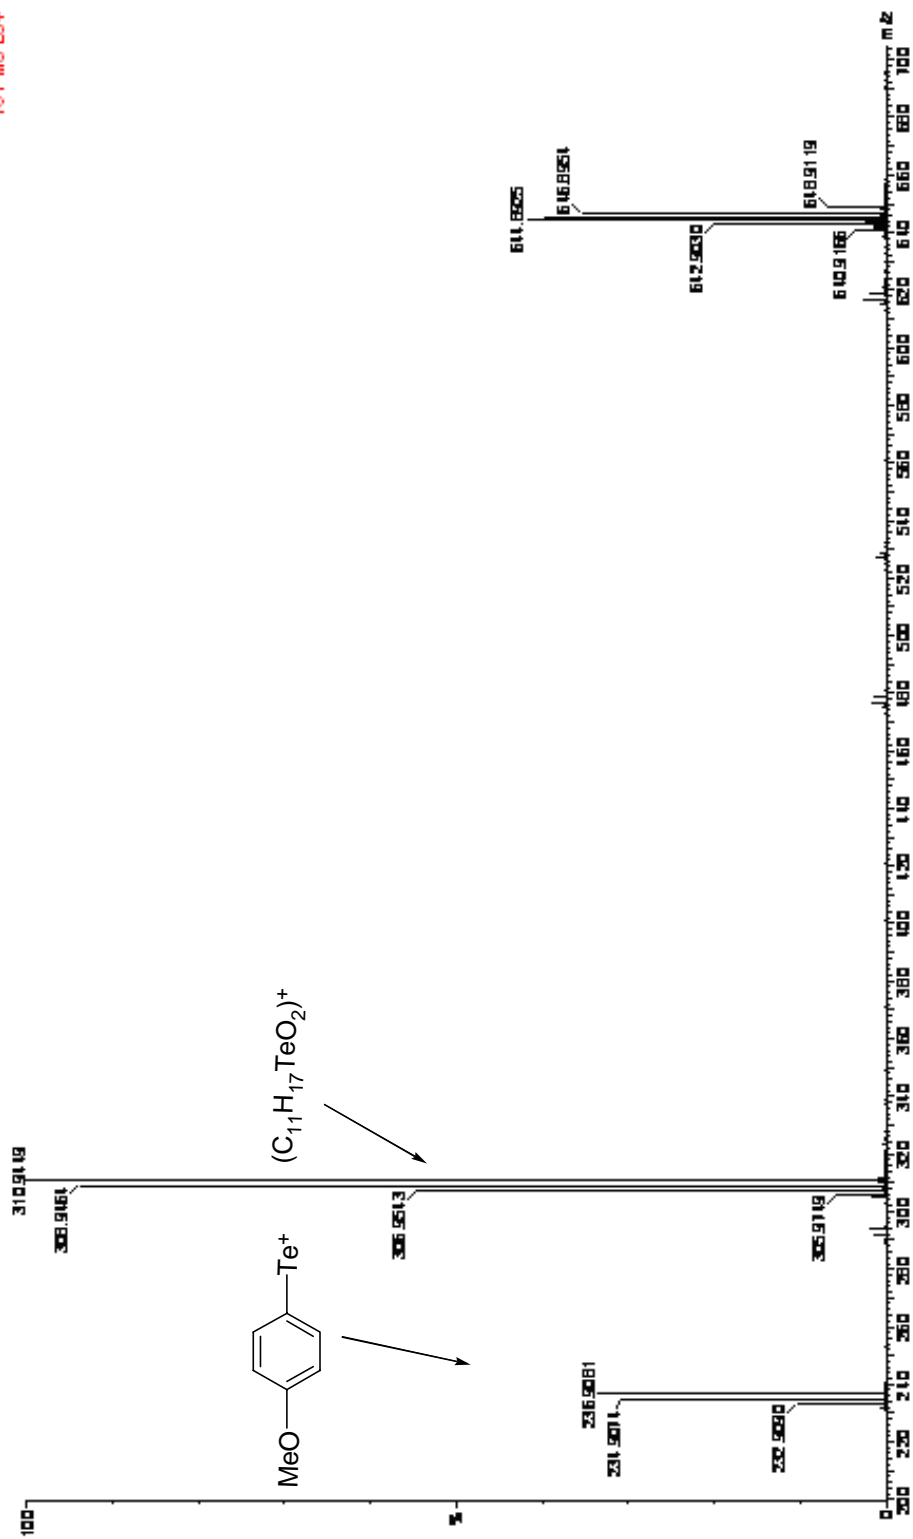

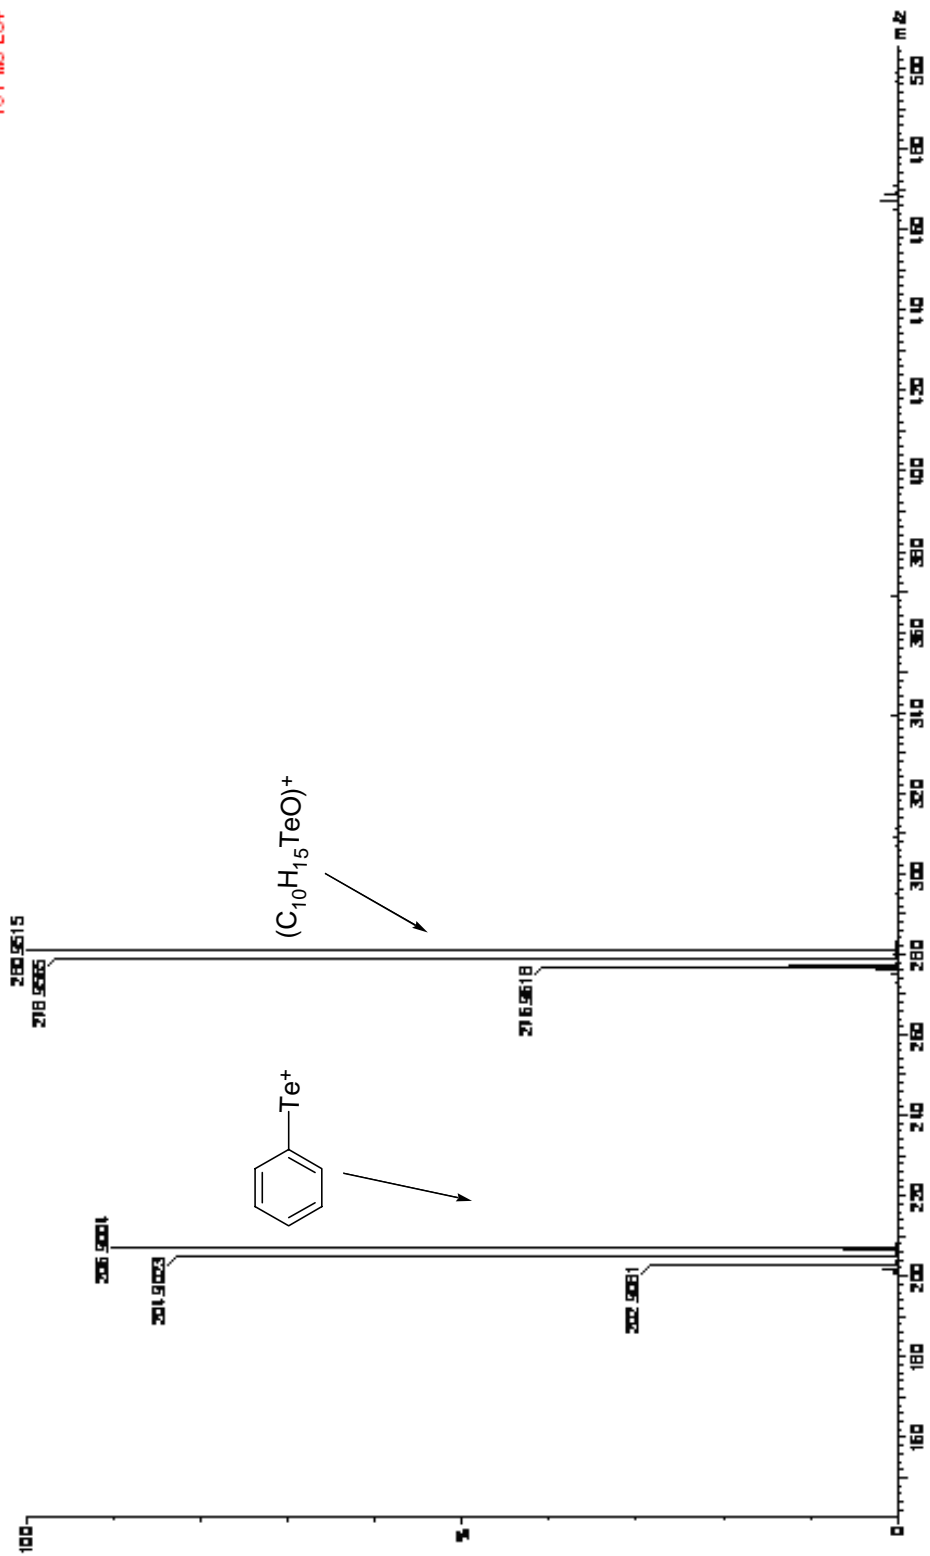

$\text{Pd}(\text{PPh}_3)_4$

TOF MS ES+

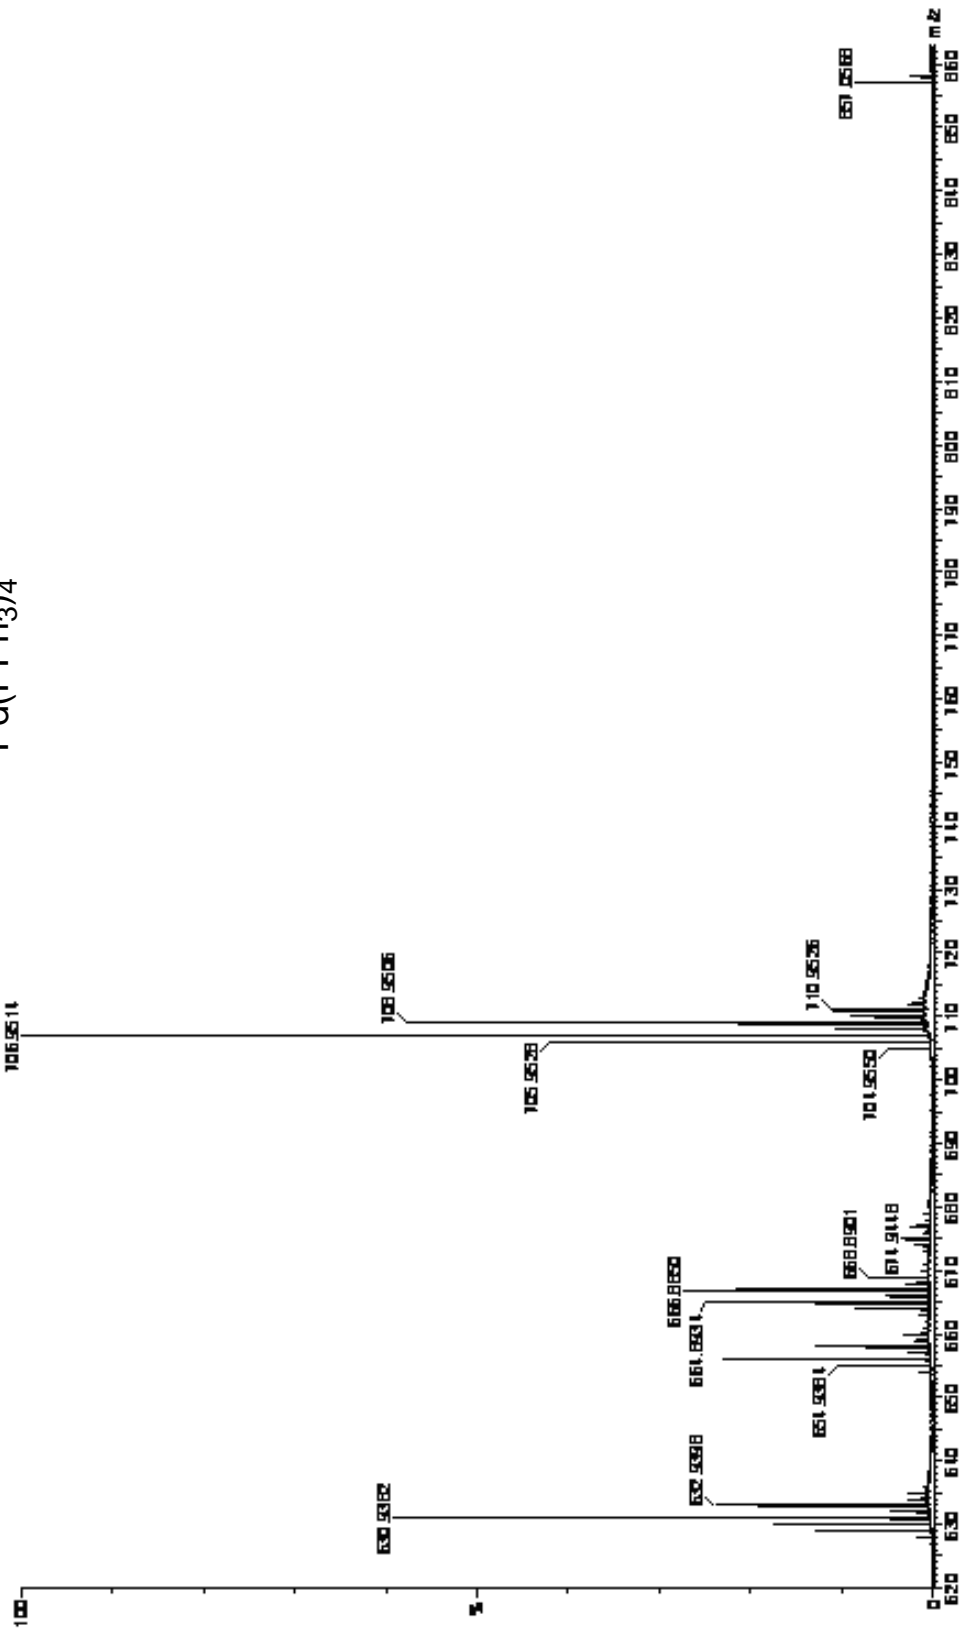

TOF MS ES+

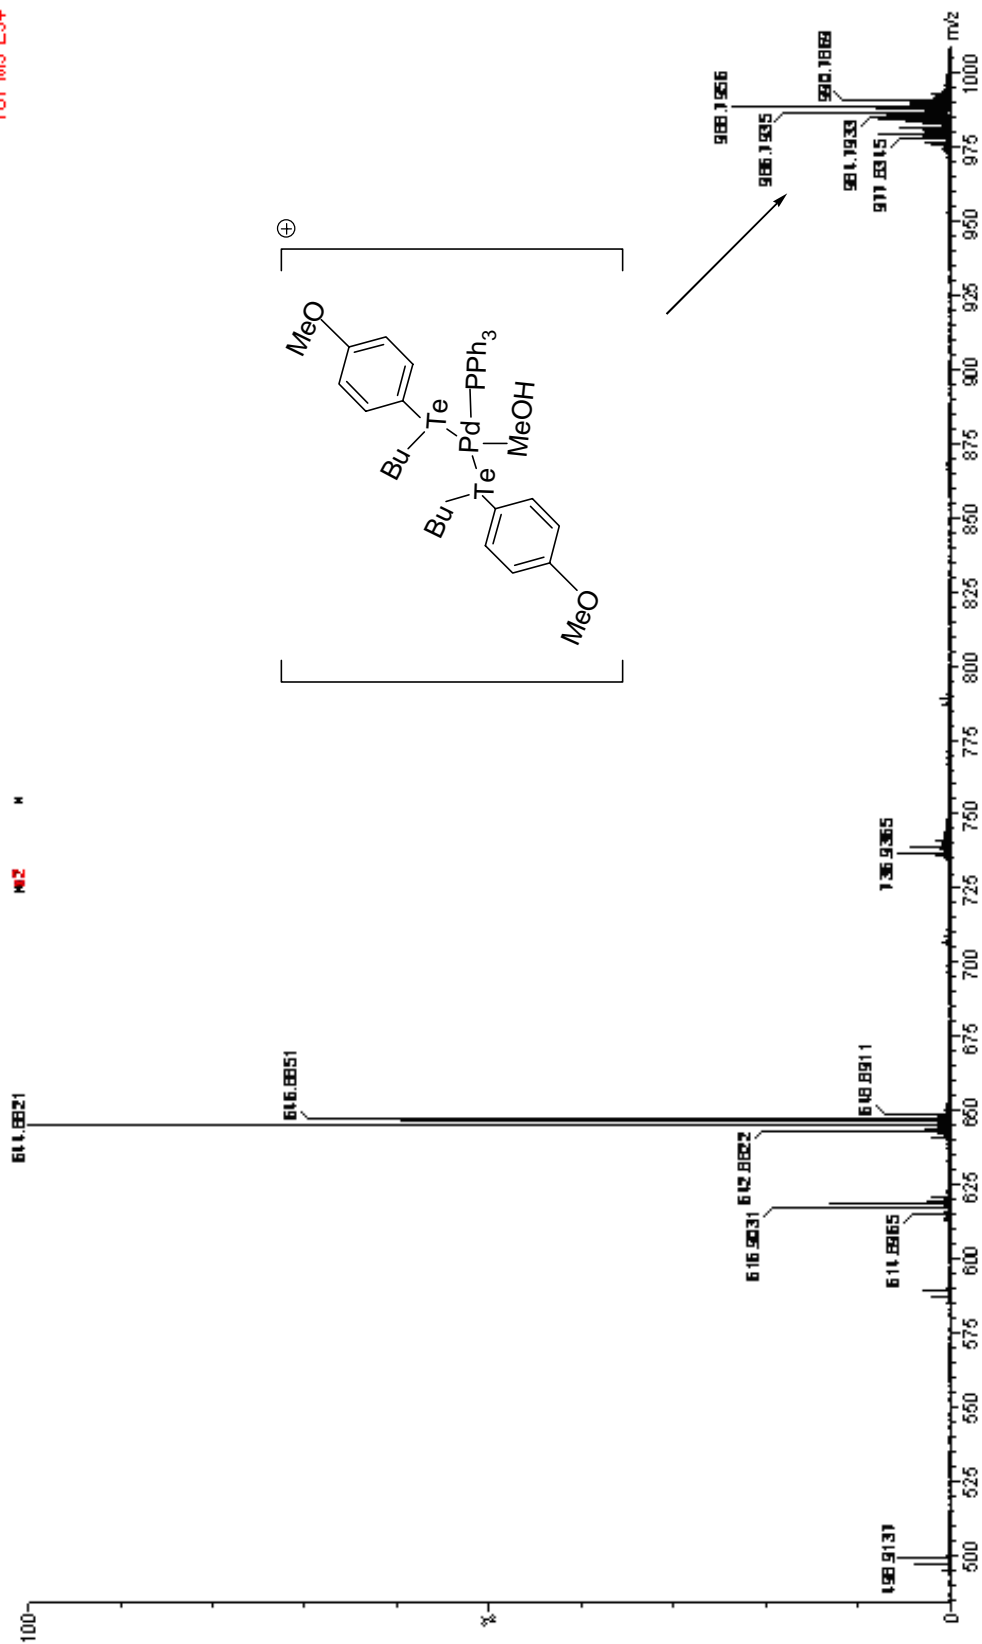

TO F MS ES+

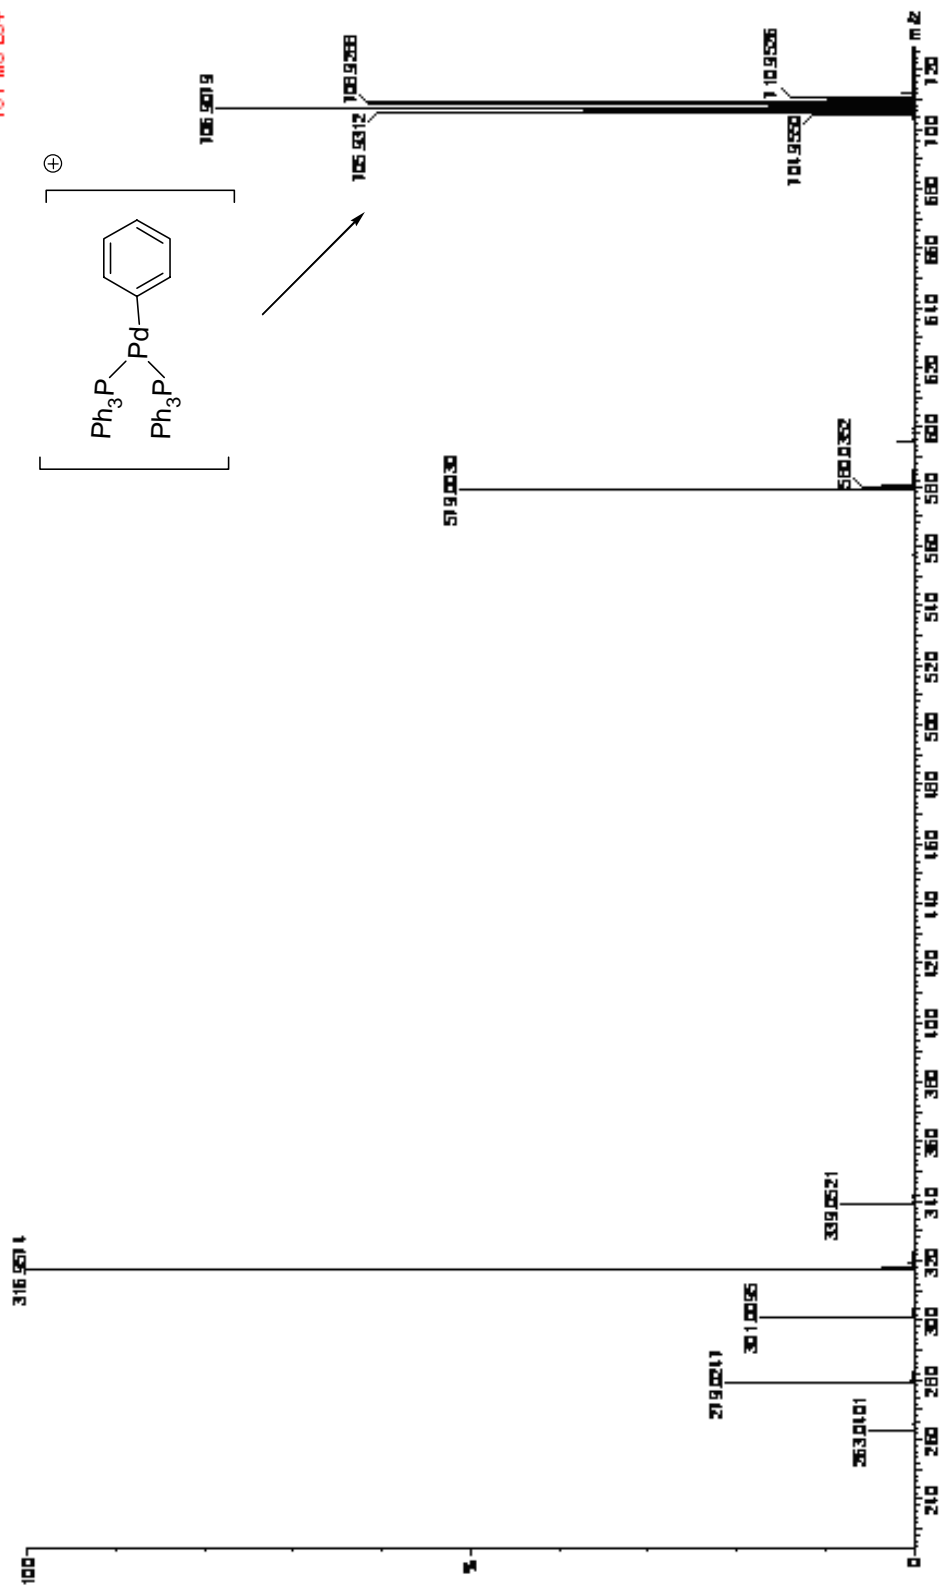

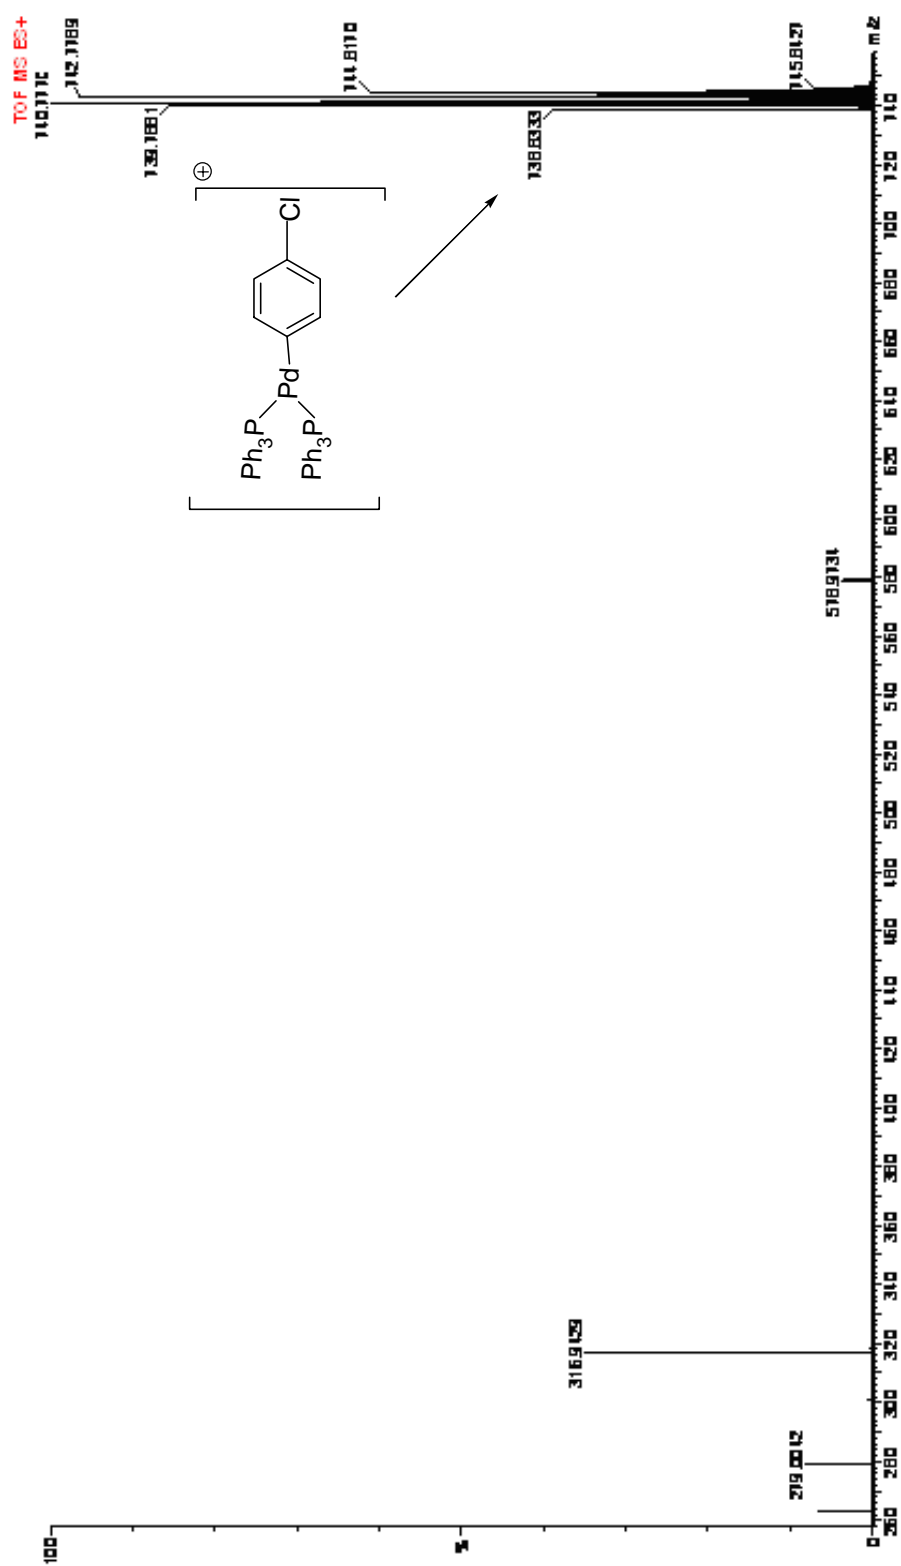

TOF MS ES+

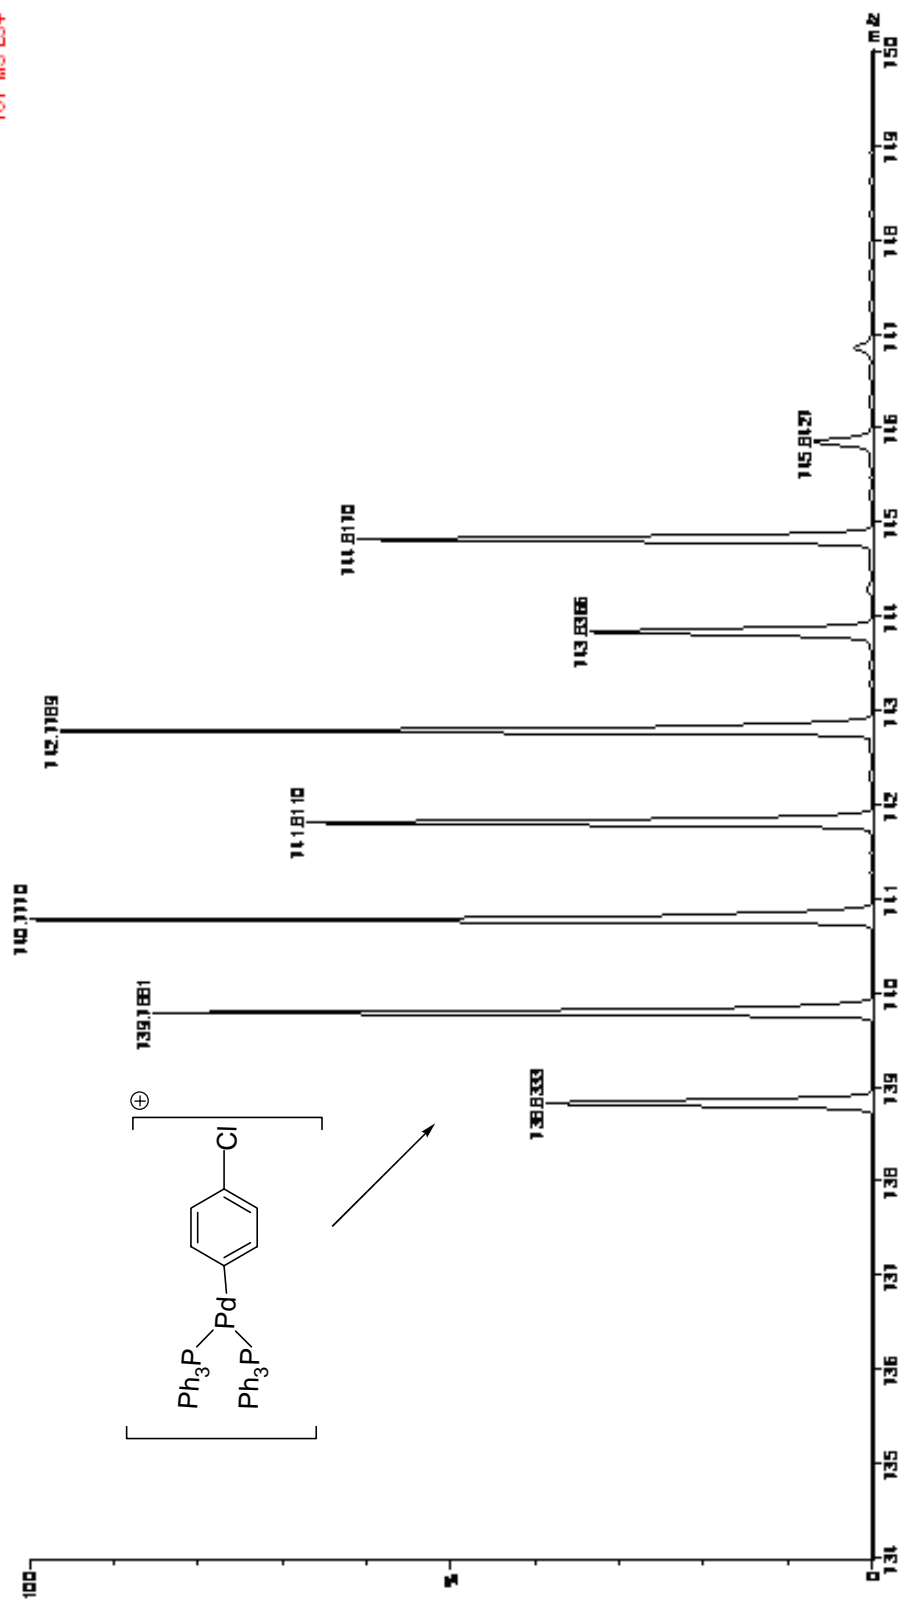

Supplement: Supplementary file 1 [file 5079514]
